# Supplementary material for: Couples motivational interviewing with mobile breathalysers to reduce alcohol use in South Africa: a pilot randomised controlled trial of Masibambisane
Source: PubMed Central journal article supplement — BMJ Open. 2024 Jan 30;14(1):e083390. doi: 10.1136/bmjopen-2023-083390 (PMC10828841; doi:10.1136/bmjopen-2023-083390), 2024-01-30
Supplement: bmjopen-2023-083390.draft_revisions.pdf [file bmjopen-2023-083390.draft_revisions.pdf]

# BMJ Open

BMJ Open is committed to open peer review. As part of this commitment we make the peer review history of every article we publish publicly available.

When an article is published we post the peer reviewers' comments and the authors' responses online. We also post the versions of the paper that were used during peer review. These are the versions that the peer review comments apply to.

The versions of the paper that follow are the versions that were submitted during the peer review process. They are not the versions of record or the final published versions. They should not be cited or distributed as the published version of this manuscript.

BMJ Open is an open access journal and the full, final, typeset and author-corrected version of record of the manuscript is available on our site with no access controls, subscription charges or pay-per-view fees (<http://bmjopen.bmj.com>).

If you have any questions on BMJ Open's open peer review process please email [info.bmjopen@bmj.com](mailto:info.bmjopen@bmj.com)

# BMJ Open

## Couples Motivational Interviewing with Mobile Breathalyzers to Reduce Alcohol Use in South Africa: A Pilot Randomized Controlled Trial of Masibambisane

|                               |                                                                                                                                                                                                                                                                                                                                                                                                                                                                                                                                                                                                                                                                                                                                                                                                                                        |
|-------------------------------|----------------------------------------------------------------------------------------------------------------------------------------------------------------------------------------------------------------------------------------------------------------------------------------------------------------------------------------------------------------------------------------------------------------------------------------------------------------------------------------------------------------------------------------------------------------------------------------------------------------------------------------------------------------------------------------------------------------------------------------------------------------------------------------------------------------------------------------|
| Journal:                      | <i>BMJ Open</i>                                                                                                                                                                                                                                                                                                                                                                                                                                                                                                                                                                                                                                                                                                                                                                                                                        |
| Manuscript ID                 | bmjopen-2023-083390                                                                                                                                                                                                                                                                                                                                                                                                                                                                                                                                                                                                                                                                                                                                                                                                                    |
| Article Type:                 | Protocol                                                                                                                                                                                                                                                                                                                                                                                                                                                                                                                                                                                                                                                                                                                                                                                                                               |
| Date Submitted by the Author: | 18-Dec-2023                                                                                                                                                                                                                                                                                                                                                                                                                                                                                                                                                                                                                                                                                                                                                                                                                            |
| Complete List of Authors:     | Msimango, Lindani; Human Sciences Research Council, Centre for Community Based Research<br>Butterfield, Rita; University of California San Francisco, Department of Medicine<br>Starks , Tyrel ; City University of New York School of Public Health, Department of Psychology<br>van Heerden , Alastair ; Human Sciences Research Council, Centre for Community Based Research; University of the Witwatersrand Johannesburg Faculty of Health Sciences<br>Neilands, Torsten; University of California San Francisco, Medicine<br>Hahn, JA; UCSF<br>Chibi, Buyisile; Human Sciences Research Council, Centre for Community Based Research<br>Humphries, Hilton; Human Sciences Research Council; University of KwaZulu-Natal, Department of Psychology<br>Conroy, Amy; University of California San Francisco, Department of Medicine |
| Keywords:                     | Behavior, HIV & AIDS < INFECTIOUS DISEASES, Medication Adherence, Substance misuse < PSYCHIATRY, Social Support                                                                                                                                                                                                                                                                                                                                                                                                                                                                                                                                                                                                                                                                                                                        |
|                               |                                                                                                                                                                                                                                                                                                                                                                                                                                                                                                                                                                                                                                                                                                                                                                                                                                        |

SCHOLARONE™  
Manuscripts

1 **Couples Motivational Interviewing with Mobile Breathalyzers to Reduce Alcohol**  
2 **Use in South Africa: A Pilot Randomized Controlled Trial of Masibambisane**

3  
4  
5  
6  
7  
8 **Authors:** Lindani Msimango<sup>1</sup>, Rita Butterfield<sup>2</sup>, Tyrel J. Starks<sup>3,4</sup>, Alastair van Heerden<sup>1,5</sup>,  
9  
10 Torsten B. Neilands<sup>2</sup>, Judith A. Hahn<sup>6</sup>, Buyisile Chibi<sup>1</sup>, Hilton Humphries<sup>1,7</sup>, Amy A.  
11  
12 Conroy<sup>2</sup>  
13

14 **Affiliations:**

- 15  
16  
17 1. Human Sciences Research Council, Centre for Community Based Research,  
18 KwaZulu-Natal, South Africa  
19  
20 2. Center for AIDS Prevention Studies, Division of Prevention Sciences, Department  
21 of Medicine, University of California San Francisco, CA, USA  
22  
23 3. Department of Psychology, Hunter College of the City University of New York  
24 (CUNY), New York, NY, USA  
25  
26 4. Doctoral Program in Health Psychology and Clinical Science, Graduate Center of  
27 CUNY, New York, NY, USA  
28  
29 5. MRC/WITS Developmental Pathways for Health Research Unit, Department of  
30 Paediatrics, Faculty of Health Science, University of the Witwatersrand,  
31 Johannesburg, South Africa  
32  
33 6. Department of Medicine, and Department of Epidemiology & Biostatistics,  
34 University of California, San Francisco  
35  
36 7. Department of Psychology, University of KwaZulu-Natal, Pietermaritzburg, South  
37 Africa  
38  
39  
40  
41  
42  
43

44 Corresponding author:

45 Amy A. Conroy, PhD, MPH  
46  
47 University of California San Francisco  
48  
49 Center for AIDS Prevention Studies  
50  
51 550 16<sup>th</sup> Street, San Francisco, CA 94158  
52  
53  
54 [amy.conroy@ucsf.edu](mailto:amy.conroy@ucsf.edu)  
55  
56  
57  
58  
59  
60

1 30

2  
3 **Abstract**4  
5 **Introduction:**

6  
7 33 Heavy alcohol use among people living with HIV in sub-Saharan Africa can hinder the  
8  
9 34 success of HIV treatment programs, impacting progress towards UNAIDS goals. Primary  
10  
11 35 partners can provide critical forms of social support to reduce heavy drinking and could  
12  
13 36 be included in motivational interviewing (MI) interventions to address heavy drinking;  
14  
15 37 however, few studies have evaluated MI interventions for couples living with HIV in sub-  
16  
17 38 Saharan Africa. We aim to evaluate the feasibility and acceptability of a couple-based MI  
18  
19 39 intervention with mobile breathalyzer technology to reduce heavy alcohol use and  
20  
21 40 improve HIV treatment outcomes among HIV-affected couples in South Africa.

22  
23 **Methods and analysis:**

24  
25 43 We will employ a three-arm randomized controlled trial to assess the efficacy of couple-  
26  
27 44 based MI (MI-only arm) and in conjunction with mobile breathalyzers (MI-plus arm) to  
28  
29 45 address alcohol use and HIV outcomes, as compared to enhanced usual care (control  
30  
31 46 arm). We will enroll heterosexual couples aged 18-49 in a primary relationship for at least  
32  
33 47 six months who have at least one partner reporting hazardous alcohol use and on  
34  
35 48 antiretroviral therapy for six months. Participants in both MI arms will attend three  
36  
37 49 manualized counselling sessions and those in the MI-plus arm will receive real-time  
38  
39 50 feedback on blood alcohol concentration (BAC) levels using a mobile breathalyzer.  
40  
41 51 Couples randomized in the control arm will receive enhanced usual care based on the  
42  
43 52 South African ART Clinical Guidelines. Feasibility and acceptability indicators will be  
44  
45 53 analyzed descriptively, and exploratory hypotheses will be examined through regression  
46  
47 54 models considering timepoints and treatment arms.

48  
49 **Ethics and dissemination:**

50  
51 58 The study was approved by the University of California, San Francisco (HRPP; Protocol  
52  
53 59 Number 21-35034) and HSRC Research Ethics Committee (REC: Protocol Number  
54  
55 60 1/27/20/21). We will disseminate the results at local community meetings, community-  
56  
57 61 level health gatherings, and conferences focused on HIV and alcohol use.

1 62  
2  
3 63  
4 64  
5  
6 65  
7  
8 66  
9  
10 67  
11 68  
12  
13 69  
14  
15 70  
16  
17 71  
18  
19 72  
20  
21 73  
22  
23 74  
24  
25 75  
26  
27 76  
28  
29 77  
30  
31  
32 79  
33  
34 80  
35  
36  
37  
38  
39  
40  
41  
42  
43  
44  
45  
46  
47  
48  
49  
50  
51  
52  
53  
54  
55  
56  
57  
58  
59  
60

### **Strengths and limitations of this study**

- Intervention was developed and tailored to the cultural context of heterosexual couples in a rural setting of KwaZulu-Natal
- Uses a dyadic approach to intervene to collect and analyse intervention effects on both partners
- Incorporates an alcohol biomarker to mitigate the limitations of self-reported drinking behavior
- Small pilot study not powered to detect changes in behavioral outcomes
- Relatively short follow-up period of six months does not allow for the assessment of long-term health effects

**Trial registration:** ClinicalTrials.gov Protocol Registration; NCT05756790; registered on March 6, 2023; <https://register.clinicaltrials.gov/>

**Protocol Version 1.0:** 19 December 2023

**Keywords:** Motivational interviewing with couples; heavy alcohol use; HIV/AIDS; antiretroviral therapy; South Africa

## 81 Introduction

### 82 *Background*

83 In sub-Saharan Africa (SSA), alcohol use is described as “adding fuel to the fire” for  
84 people living with HIV (PLWH) (1), threatening the success of HIV treatment programs  
85 and progress towards United Nations Programme on HIV/AIDS (UNAIDS) goals (2–5).  
86 South Africa is severely impacted by HIV, particularly in KwaZulu-Natal (KZN) where 27%  
87 of adults are infected with HIV (6). At 11 liters of pure alcohol per year, South Africa has  
88 some of the highest levels of per capita drinking in the world (7). Among PLWH who drink  
89 in South Africa, 50-90% report heavy alcohol use (8–10). Notably, South Africa also has  
90 some of the highest rates of gender-based violence worldwide (11,12), which is closely  
91 linked to heavy alcohol use (13,14). For PLWH, alcohol use contributes to poor adherence  
92 to antiretroviral therapy (ART) and retention in HIV care (15–17).

93 Our research in SSA suggests that primary partners are key to the success of alcohol  
94 interventions given their critical role in helping people reduce alcohol use and the couple  
95 dynamics that intersect with alcohol use (18–21). In South Africa, partners mitigate the  
96 harms of alcohol use by helping drinkers manage their alcohol use while maintaining  
97 adherence to ART (19); however, communication around reducing alcohol use is not  
98 always effective and can be limited by gender-based power imbalances. This suggests  
99 the need for interventions to build couples’ communication skills and shared decision-  
100 making around alcohol use (20). Harnessing this powerful form of social support is critical  
101 in a setting where clinical services for alcohol misuse are inadequate and can be costly  
102 for patients.

103 One approach that has been effective at reducing alcohol use among PLWH is  
104 motivational interviewing (MI) in conjunction with mobile technology for real-time feedback  
105 on drinking levels (22–29). MI is a collaborative, goal-oriented style of communication  
106 with particular attention to the language of change (30). It is designed to strengthen  
107 personal motivation for and commitment to a specific goal by eliciting and exploring the  
108 person’s own reasons for change in an atmosphere of acceptance and compassion (30).  
109 Few MI approaches with couples have been developed for alcohol use, particularly in the  
110 African context (21,31–33). Although Starks articulated a comprehensive framework for  
111 MI practice with couples (34), most of the research on feasibility and acceptability (21,35),

1 112 and preliminary efficacy (32,36) of the approach has come from the study of male couples  
2 113 in the US.

3  
4  
5 114 In studies with individuals, daily monitoring of drinking levels, when paired with MI, has a  
6 115 greater effect on drinking than MI alone (27–29) and we hypothesize that monitoring may  
7 116 have additional benefits with couples. Although primary partners are generally aware of  
8 117 a person's alcohol use, they may have inaccurate knowledge of drinking amounts and  
9 118 frequency if not drinking together. Accurate knowledge of drinking levels in real-time is  
10 119 critical to trigger couples' communication as well as timely and tailored social support.  
11 120 Mobile breathalyzers have been shown to be a feasible and acceptable strategy for self-  
12 121 monitoring alcohol use in studies with individuals and new products have been developed  
13 122 for dyads that allow for sharing of blood alcohol concentration (BAC) levels with support  
14 123 partners via a mobile app (37–39). In sum, mobile breathalyzers can provide real-time  
15 124 feedback and support, which can be synergistic with an MI approach with couples that  
16 125 fosters couple communication and problem-solving skills to effectively engage with the  
17 126 breathalyzers and work together to reduce alcohol use.

### 27 28 127 **Objectives**

29  
30 128 The main aim of this study is to evaluate the feasibility and acceptability (F&A) of a  
31 129 couples-based intervention for heavy alcohol consumption among HIV-affected couples  
32 130 (*Masibambisane*, “Let's work together” in *isiZulu*). Our primary hypothesis is that  
33 131 *Masibambisane* will be feasible and acceptable. As exploratory hypotheses, we expect  
34 132 that participants who receive the intervention will report lower number of drinking days  
35 133 and heavy alcohol use (a combined measure of self-report and an alcohol biomarker),  
36 134 and greater rates of viral suppression and adherence to ART at follow-up visits.

37  
38  
39  
40  
41  
42 135

### 43 44 136 **Methods and analysis**

#### 45 46 137 ***Trial design***

47 138 We will conduct a three-arm randomized controlled trial (RCT) with couples randomized  
48 139 to the following arms: 1) an enhanced usual care (EUC) control condition; 2) couple-  
49 140 based MI (MI-only arm); and 3) couple-based MI with mobile breathalyzers (MI-plus arm).  
50 141 Couples in arm 2 and 3 will receive three MI sessions over a 60-day period with an  
51 142 experienced counselor to help strengthen communication and problem-solving skills  
52 143 around alcohol use. Couples in Arm 3 will use a mobile breathalyzer and app for 60 days

1 144 and receive the same MI sessions, which will incorporate feedback on BAC results into  
2 145 the sessions. This design will allow us to assess the efficacy of couple-based MI alone  
3 146 and the added synergistic effect of the mobile breathalyzers on alcohol use and HIV  
4 147 outcomes (e.g., adherence to ART, viral suppression).  
5  
6  
7

8 148

### 9 149 **Study setting**

11 150 The *Masibambisane* study will be conducted by the Human Sciences Research Council  
12 151 (HSRC) in the Sweetwaters community, a rural area west of the capital of KwaZulu-Natal,  
13 152 Pietermaritzburg, South Africa.  
14  
15

16 153

### 18 154 **Eligibility criteria**

19 155 Couples will be included in the study if they are: (1) in a primary relationship for at least  
20 156 six months; (2) aged 18-49; (3) have at least one partner (the “index patient”) with a  
21 157 positive AUDIT-C screen (score of 3 or more for women and 4 for of more for men;  
22 158 modified to cover the prior 3 months) (40) and on ART for at least six months. We expect  
23 159 all participants to be on oral ART regimens as long-acting ART was not available at the  
24 160 time of this study in South Africa. All participants living with HIV will be required to have  
25 161 disclosed their HIV status to their partner in the study. Lastly, both partners will separately  
26 162 agree to participate in order for the couple to be enrolled.  
27  
28  
29

30 163  
31 164 We will exclude participants with an AUDIT-C score greater than 12, indicating risk of  
32 165 severe alcohol use disorder. Participants with severe drinking issues may not benefit from  
33 166 a short-term counseling-based intervention and may need more intensive treatment than  
34 167 our study can provide. Our intervention may also not be appropriate for couples  
35 168 experiencing severe intimate partner violence (IPV). Thus, we will exclude those who fear  
36 169 for their safety by participating in the study and/or report severe IPV in the past 3 months.  
37 170 IPV is assessed using the WHO measure for South Africa, which assesses physical,  
38 171 sexual, and emotional violence, and determines whether it is mild, moderate, or severe  
39 172 (41). This trial does not place restrictions on concomitant receipt of care for alcohol use  
40 173 or HIV care and treatment.  
41  
42  
43  
44  
45  
46  
47  
48  
49  
50  
51

52 174

53 175

54 176



## 187 **Intervention development**

188 We adapted the *Masibambisane* intervention from the 3-session couples MI intervention  
189 protocol originally developed by Starks et al. for use in the *Couples Health Project* (36).  
190 The original intervention was intended to reduce drug use and enhance primary HIV  
191 prevention among male couples in the US. In contrast, the *Masibambisane* intervention  
192 will address heavy alcohol use among heterosexual couples in South Africa in which at  
193 least one partner is living with HIV. The adaptation process therefore had to consider: 1)  
194 cultural and linguistic context; 2) reformulation of the new target behavior (i.e., to heavy  
195 alcohol use); and, 3) integration of the mobile breathalyzer component.

196  
197 We followed the ADAPT-ITT framework (42) to arrive at the final version of the  
198 *Masibambisane* intervention. Consistent with step 5 in the ADAPT-ITT framework, we  
199 conducted focus group discussions (FGDs) with 36 key stakeholders to gain feedback on  
200 the intervention content and activities, including perceptions of the mobile breathalyzer  
201 technology. This feedback was integrated in the creation of a modified intervention  
202 manual (ADAPT-ITT step 6). The revised manual was reviewed by 8 members of the  
203 research team during the intervention training process (ADAPT-ITT step 7) – including  
204 the counselors who would deliver the intervention. Their feedback was used to refine and  
205 finalize the *Masibambisane* manual to maximize usability and enhance cultural relevance.

## 206 ***Masibambisane* intervention arms**

207 Participants in the MI-only and MI-plus arms will receive three in-person manualized MI  
208 sessions as a couple with a trained counselor in the language of their preference (either  
209 *isiZulu* or English). Sessions take place approximately 30 days apart over a period of 2  
210 months. In addition, the index participant in the MI-plus arm will make use of the mobile  
211 breathalyzer and companion app, which will deliver real-time feedback on the index  
212 participant's BAC levels to both partners for two months. The couples randomized to MI-  
213 plus will receive brief technology training on how to operate the mobile breathalyzer and  
214 app followed by a short trial period to become familiar with the technology before starting  
215 intervention activities. All sessions are conducted with both partners together and each  
216 lasts 60 to 75 minutes. The manual will provide guidance on sequencing of content. It is  
217 executed in a manner consistent with the spirit, processes, and techniques of couples MI  
218 outlined by Starks (34,36).

1 210  
2  
3 211 **Session 1.** The counselor first orients the couple to the structure and nature of the  
4 212 intervention and reminds them about the limits of confidentiality. After initial engagement  
5 213 and rapport building, the counselor invites the couple to reflect on communication  
6 214 strengths and weaknesses before engaging in strengths-based communication skill  
7  
8 215 building. The topic of alcohol use is introduced through the use of a calendar activity  
9 216 developed for Dr. Starks' previous studies (32,36). Partners who report heavy alcohol use  
10  
11 217 at baseline complete the calendar by indicating days they consumed alcohol in the past  
12  
13 218 30 days. This serves as an immediate feedback tool that the counselor uses to catalyze  
14  
15 219 a conversation about alcohol use and evoke relevant change talk. This discussion  
16  
17 220 culminates in the couple identifying what they would like alcohol use to look like in the  
18  
19 221 coming month and developing a shared plan to accomplish that goal. The session ends  
20  
21 222 with the counselor inviting the couple to notice communication successes and challenges  
22  
23 223 and to schedule a pleasant event together in the coming month (in addition to  
24  
25 224 summarizing the couple's alcohol related goals and plans).  
26  
27 225

28 226 **Session 2.** The session begins with a check-in on recent communication and goals from  
29  
30 227 the previous session. The couple then completes a values card-sort exercise highlighting  
31  
32 228 shared values and joint goals. For *Masibambisane*, the standard values card sort deck  
33  
34 229 (43) used in previous MI interventions with couples (36) was modified to increase cultural  
35  
36 230 relevance and translated into *isiZulu*. Following the card-sort exercise, counselors refocus  
37  
38 231 the conversation on alcohol use by completing another calendar activity. For participants  
39  
40 232 randomized to couples MI, this procedure mirrors that used in Session 1. For couples  
41  
42 233 randomized to MI-plus, the counselor presents the couple with breathalyzer data for the  
43  
44 234 index partner from the prior month, presented in a calendar format. Data for the non-index  
45  
46 235 partner (if also reporting heavy alcohol use at baseline) are added to this calendar. In  
47  
48 236 addition to debriefing the calendar, couples in the MI-plus condition discuss their  
49  
50 237 experiences using the breathalyzer and receiving the BAC readings of their partner. After  
51  
52 238 the calendar is created and debriefed, the counselor further evokes change talk with a  
53  
54 239 series of questions about potential consequences of drinking. Similar to session 1, the  
55  
56 240 discussion culminates in the couple identifying what might be reasonable drinking limits  
57  
58 241 for the coming month and developing a shared plan to accomplish that goal. The session  
59  
60 242 ends with the counselor inviting the couple to notice communication successes and

243 challenges and to schedule a pleasant event together in the coming month (in addition to  
244 summarizing the couple's alcohol related goals and plans).

245  
246 **Session 3.** The session begins with a check-in on recent communication and goals from  
247 the previous session. Similar to session 2, counselors then refocus the conversation on  
248 alcohol use by completing another calendar activity. As in session 2, participants  
249 randomized to MI-only complete the calendar following session 1 procedures. Those  
250 randomized to MI-plus are presented with a calendar containing prior month breathalyzer  
251 data. After the calendar is created and debriefed, the counselor further evokes change  
252 talk with a series of questions about potential consequences of drinking specifically for  
253 HIV-related health care outcomes and the couple's communication and sexual  
254 interactions. Similar to session 1, this discussion culminates in the couple identifying their  
255 drinking goals for the coming month and developing a shared plan to accomplish that  
256 goal. Finally, counselors engage in a termination discussion. This begins by inviting the  
257 couple to reflect on their experiences over the past two months while engaged in the  
258 intervention. The couple then looks ahead and considers long-term goals – including  
259 specific goals for limits on alcohol use – and constructs a shared plan to accomplish them.

### 261 **Mobile breathalyzer and app**

262 We will use BACtrack View®, which consists of a handheld commercial-grade  
263 breathalyzer and accompanying mobile app. Index patients will receive twice-daily SMS  
264 message requests to complete a breathalyzer reading at 11 am and again at 8 pm. Given  
265 the frequent power outages in South Africa, which often result in a loss of cellular service,  
266 participants will be allowed to complete missed tests as soon as the power returns. To  
267 avoid disruptions in cellular service by having to manually purchase data, we will  
268 automatically provide cellular data to perform the tests. We will also provide phones to  
269 participants who do not have compatible smartphones and power banks to keep phones  
270 and breathalyzers charged during power outages.

271  
272 To complete a breathalyzer test, the participant will log into the mobile phone app and  
273 follow a series of prompts to blow into the breathalyzer in front of the phone camera,  
274 which displays the BAC value, and transmits the BAC value and photo of the participant  
275 taking the test to the BACtrack View® server for storage. After successfully completing

1 276 the test, the partner will receive an SMS message informing them of the BAC value from  
2 277 the index patient. The study coordinator is notified of BAC results and/or missed tests and  
3  
4 278 can log into the BACtrack View® app to view all tests results completed over a monthly  
5  
6 279 period. A trained technology navigator will be assigned to each couple, who will reach out  
7  
8 280 to couples who are missing tests and will be available for support as couples are getting  
9  
10 281 started with the BAC tests. At the end of each 30-day period, BAC results are mapped  
11  
12 282 onto monthly calendars and used in subsequent MI counseling sessions.

13 283

#### 14 284 **Control arm: Enhanced usual care (EUC)**

15 285 Couples in the control arm will receive EUC, with usual care defined by the South African  
16  
17 286 national 2019 ART Clinical Guidelines (44). As part of clinical care for HIV, the harms of  
18  
19 287 alcohol use are briefly discussed during the morning health talks in the waiting rooms of  
20  
21 288 HIV clinics. HIV clients are advised that alcohol intake should be fewer than 2 standard  
22  
23 289 drinks/day for men and 1 for women, and drinking should not occur daily (at most 5 out  
24  
25 290 of 7 days per week). After randomization, couples in the control arm will receive additional  
26  
27 291 alcohol counseling modeled on WHO guidelines and Conroy et al.'s intervention in  
28  
29 292 Malawi, which uses participants' baseline AUDIT scores for messaging around alcohol  
30  
31 293 reduction and lasts 10-15 minutes (45). In selecting the control, we chose to balance our  
32  
33 294 ethical obligation to provide basic health information on alcohol use (minimal in this  
34  
35 295 setting), while maximizing the generalizability of our findings to inform a future RCT, which  
36  
37 296 will employ a EUC control group. Clinical trial experts recommend the usual care condition  
38  
39 297 over other designs such as a time-and-attention control (TAC) when the long-term goal  
40  
41 298 is to inform implementation science and scale-up (46,47). Our long-term goal will be to  
42  
43 299 test the effectiveness of a scalable alcohol intervention. Moreover, because TAC designs  
44  
45 300 have an active but different intervention, there is the risk of positively-biased intervention  
46  
47 301 results because the comparison arm can distract participants from making reductions in  
48  
49 302 alcohol use they would have otherwise made (46,47).

303

#### 304 **Training of staff**

305 305 Given the skills required to deliver MI, we will hire certified HIV testing counselors with 2+  
306  
307 306 years of counselling and/or facilitation and community experience. Facilitators and the  
307  
308 307 HSRC research manager will attend a week-long didactic training workshop (in-person,

1 308 at the HSRC) with Dr. Starks. Dr. Starks is a licensed clinical psychologist and an MI-  
2 309 trainer certified by the Motivational Interviewing Network of Trainers.  
3

4 310

5  
6 311 The training workshop will begin with a 1-day introduction to individual MI skills (30). This  
7 312 workshop will focus on the spirit of MI, engaging skills (open questions, affirmations,  
8 313 reflections, and summary statements), and recognizing change talk (expressions of  
9 314 desire, ability, reasons, need, commitment, activation, and taking-steps to change). The  
10 315 first training day will end with a demonstration of couples MI delivered in *isiZulu* (through  
11 316 a translator) by Dr. Starks. Days 2 through 5 will focus on the spirit, processes, and skills  
12 317 of MI with couples. Activities will consist of brief didactic presentations of content  
13 318 interspersed with worksheets to reinforce knowledge acquisition and a wide variety of  
14 319 role-play activities permitting practice. Beginning in day 3, role play activities will be used  
15 320 to introduce counselors to key aspects of the intervention protocol and facilitate practice  
16 321 with immediate feedback from Dr. Starks.  
17  
18  
19  
20  
21  
22  
23  
24

25 322

26 323 Following the training workshop, all interventionists will complete a series of training mock  
27 324 sessions to practice the intervention content. These will be completed in English,  
28 325 recorded, and reviewed by Dr. Starks. Counselors will receive written feedback and meet  
29 326 biweekly with Dr. Starks to discuss progress in the mock session process and review  
30 327 relevant skills. All interventionists will complete a minimum of 2 mock sessions for each  
31 328 intervention component before being cleared to deliver the intervention to participants.  
32  
33  
34  
35  
36  
37

38 329

39 330 We will also train a pair of interviewers to recruit couples and conduct assessment visits,  
40 331 who will be gender-matched to partners. Drs. Conroy and Butterfield will lead additional  
41 332 training with staff, covering topics on couples counseling, the mobile breathalyzer  
42 333 technology, how to handle ethical issues with couples, health education around alcohol  
43 334 use and HIV, the intervention manuals and procedures, and professional conduct.  
44  
45  
46  
47

48 335

### 49 336 **Fidelity monitoring and supervision**

50 337

51 338 Once cleared, interventionists will meet monthly (via Zoom) with Dr. Starks for group  
52 339 supervision while sessions are ongoing during the trial. These meetings will provide an  
53  
54  
55  
56  
57  
58  
59  
60

1 340 opportunity to present and discuss cases, review relevant skills, and discuss ongoing  
2 341 challenges to protocol delivery.  
3  
4

5 342 Given the large number of sessions conducted, we will select a sample of sessions  
6 343 (around 15%) to perform additional fidelity checks giving equal attention to all counselors  
7 344 and all sessions. For these sessions, a peer facilitator (i.e., another counselor) or the  
8 345 research manager will complete a checklist using either transcripts or audio-recordings  
9 346 to ensure each activity in the manual was covered. Intervention sessions will be audio-  
10 347 recorded. Self-assessment forms will contain rating for key MI components (e.g.,  
11 348 collaboration, respect, etc.). A separate space on the checklist and self-assessment forms  
12 349 will be provided for written comments. After each session, counselors will complete the  
13 350 self-assessment form. Completed forms will be discussed in regular Zoom calls with the  
14 351 team to discuss areas where further guidance is needed and to help problem-solve  
15 352 challenges. Finally, Dr. Starks will listen and provide feedback on any sessions conducted  
16 353 with English-speaking couples as an additional check on fidelity to the intervention  
17 354 protocol.  
18  
19  
20  
21  
22  
23  
24  
25  
26  
27  
28

29 355

## 30 356 **Recruitment**

31 357 Community-based recruitment will be used to identify index patients at community-based  
32 358 organizations or locations in the community where people who drink alcohol can be found.  
33 359 Recruiters will use procedures established at HSRC to identify and recruit participants  
34 360 using a community mobilization approach. A team of recruiters will target individuals and  
35 361 couples in public areas in the community, including alcohol venues (e.g., shebeens, bottle  
36 362 shops), markets, sports grounds, taxi ranks, HIV clinics, and community events. Though  
37 363 couples will be targeted together if possible, couples may not be together in public (48)  
38 364 and this could hinder successful recruitment of couples into research studies in the area.  
39  
40  
41  
42  
43  
44  
45

46 365

47 366 Passive recruitment will also be utilized. This includes distributing community flyers  
48 367 describing the study and encouraging interested individuals to contact the project staff by  
49 368 calling or sending a free "please call me" SMS text message to the listed cellular phone  
50 369 number. Recruiters will respond to these messages as soon as possible, typically no later  
51 370 than the next working day. Passive recruitment will further be employed through flyers  
52 371 placed at the clinics. Clinic-based outreach teams and care providers will assist in  
53  
54  
55  
56  
57  
58  
59  
60

1 372 identifying HIV patients who use alcohol use and have been on ART for at least six  
2 373 months, referring them to HSRC recruiters. In all recruitment approaches, recruiters will  
3 374 ask potential participants if they would like to hear about the study and explain the nature  
4 375 of the study using standard recruitment scripts.  
5  
6 376

7

### 8 377 **Screening for participation**

9 378 Screening will be a two-step process. The initial screener will be delivered either in-person  
10 379 or over the phone. If recruited in person, the screener will take place in a private location  
11 380 identified by the recruiter. Partners in a couple will be screened separately to ensure  
12 381 confidentiality. If the participant cannot complete the initial screener in the field, the  
13 382 recruiter will record their contact information for a later phone screening. Once deemed  
14 383 eligible to continue, the recruiter will inform the index participant that their partner must  
15 384 also be screened. Contact information for the recruited partner will be collected and  
16 385 permission to call them will be obtained. Alternatively, the partner can initiate contact via  
17 386 a "please call me" SMS text message. The index participant will be provided with study  
18 387 information to share with the partner.  
19

20 388

21 389 Couples meeting initial eligibility criteria will be given a secondary screener in person that  
22 390 asks a variety of questions not limited to IPV. The members of the couple will be screened  
23 391 simultaneously but separately by gender-matched interviewers. The goal is to screen out  
24 392 illegitimate couples or those who experienced severe IPV in the past three months or  
25 393 have safety concerns. In case a couple is deemed ineligible due to IPV, they will not be  
26 394 informed of the reason for ineligibility to minimize any unintended harms. As part of the  
27 395 second screener, questions about how the couple met will be asked (with the answer not  
28 396 recorded). After completing the second screener, the two recruiters will compare their  
29 397 notes and determine if the couple is legitimate. If not, the recruiters will inform the couple  
30 398 of their ineligibility without providing a specific reason.  
31

32 399

33 400 During this screening interview, staff will use a rapid HIV test to confirm HIV status for all  
34 401 participants who reported living with HIV. If the index patient tests negative for HIV on the  
35 402 point-of-care (POC) HIV test, they will be considered ineligible. Both partners must be  
36 403 eligible for the couple to be considered eligible for the study.  
37

38 404

1 405 If both members of the couple report heavy alcohol use during screening and are on ART,  
2 406 the male partner will be assigned to be the index patient given that drinking among men  
3 407 is generally more frequent than women in similar types of couples (18,49). For the MI-  
4 408 plus arm, only the index patient will receive the breathalyzer and mobile app as the tester;  
5 409 their partner will only receive SMS text notifications of their BAC levels.  
6  
7  
8  
9

410

### 411 **Randomization**

12 412 After informed consent and the baseline assessment, couples will be randomized to the  
13 413 control arm, the couple-based MI arm, or the couple-based MI with mobile breathalyzers  
14 414 arm (MI-plus). We will use randomly permuted block sizes (e.g., 3, 6, and 9) generated  
15 415 using a computerized and secure process. The UCSF project coordinator and the HSRC  
16 416 data manager will use the table that the study statistician created to print documents that  
17 417 assign participants to one of the three arms. These documents will be placed in sealed  
18 418 envelopes ordered sequentially in a box and maintained by the HSRC data manager in a  
19 419 locked cabinet. HSRC interviewers will take a small subset of envelopes into the field with  
20 420 them and will be trained to administer random assignments following the order of the  
21 421 envelopes. At the end of the baseline survey, the index patient will be given the envelope  
22 422 that contains the random assignment. Couples will receive an appointment card with a  
23 423 date for their next study visit following randomization.  
24  
25  
26  
27  
28  
29  
30  
31  
32  
33

424

### 425 **Blinding**

34  
35 426 Counselors delivering the intervention cannot be blinded to the intervention condition.  
36 427 Assessment staff are different from the staff who delivered the intervention to a given  
37 428 couple. However, because the assessment staff work in close collaboration with the  
38 429 counselors in tracing couples and assisting with technology navigation for those in the  
39 430 MI-plus arm, we cannot fully guarantee that assessment staff will be blinded from the  
40 431 intervention condition as well. Participants will also not be blinded to the intervention  
41 432 condition and will be informed during randomization of their assigned group.  
42  
43  
44  
45  
46  
47  
48  
49

433

### 50 434 **Data collection**

51 435 Study assessments will occur at baseline, 2-months and 6-months post intervention  
52 436 initiation. The two-month visit will occur after completion of the MI sessions. All surveys  
53 437 will be delivered in-person using same-sex interviewers who are fluent in both English  
54  
55  
56  
57  
58  
59



1 438 and *isiZulu* to be able to use the participants' preferred language. Study staff will enter  
2 439 data directly into REDCap using a mobile tablet. The REDCap mobile app is designed to  
3 440 be used without internet access, so it is suitable for areas with an internet connection.  
4 441

5 442

### 6 442 **Laboratory testing**

7 443 At the 2-month visit, dried blood spot (DBS) samples will be collected from all participants  
8 444 who reported heavy alcohol use at baseline to test for Phosphatidylethanol (PEth), an  
9 445 alcohol biomarker that is well correlated with total alcohol consumption in the prior 2-4  
10 446 weeks (50,51). Additionally, at the 2-month visit, DBS samples will be collected for all  
11 447 index patients living with HIV to test for viral load. We will prepare DBS by pipetting whole  
12 448 blood onto Whatman 903 cards. DBS cards for PEth will be stored at room temperature  
13 449 in locked cabinets and transported to a commercial laboratory in the United States for  
14 450 PEth quantification (16:0/18:1 analog), with lower limit of quantification of 8 ng/ml (52).  
15 451 PEth is well-correlated with breathalyzer-assessed number of days drinking over 21 days  
16 452 (53) and the volume of alcohol consumed in the past 21 days (51). DBS cards for viral  
17 453 load will be transported on a daily basis to an accredited laboratory in South Africa and  
18 454 processed using the Panther System with a lower limit of detection of 883 copies/ml.  
19 455

20 456

### 21 456 **Data management**

22 457 We will use built-in controls within REDCap to restrict out of range values and prompts  
23 458 will be given to alert the user to missing data or unusual entries. The mobile application  
24 459 displays questions on the screen and then gives interviewers the ability to enter  
25 460 responses directly into the mobile phone or tablet. Once complete, the research  
26 461 instrument (i.e., survey, baseline interview) is temporarily stored in a non-readable  
27 462 encrypted file on the device/tablet. When in an area with network coverage or back at the  
28 463 research office, completed forms are uploaded and removed from the tablets  
29 464 approximately every 60 seconds. If no network signal is present, the data is stored on the  
30 465 mobile device until such time that it detects a network signal. Checks will be placed to  
31 466 ensure correct information has been entered by the HSRC Research Manager.  
32 467 Information from the research instruments is then uploaded to a secured server. The data  
33 468 undergoes both internal and external quality checks, conducted by the UCSF Research  
34 469 Manager and the HSRC Data Science Unit. Additionally, incoming data will be monitored  
35 470 daily to identify any unusual or unexpected entries. In cases where such entries are  
36 471

1 471 detected, data queries will be generated, and the HSRC team will be contacted to address  
2 472 and resolve these queries.  
3

4 473

## 6 474 **Retention**

7 475 Upon enrollment, we will obtain contact information (e.g., two cell phone numbers,  
8 476 directions to households, and contact information for up to three other individuals) to  
9 477 facilitate tracking. Participants will be contacted regularly (e.g., twice a month) to update  
10 478 contact information and check on location. Prior to the assessment visits, reminder calls  
11 479 and SMS messages will be made to both partners one week before the appointment and  
12 480 again 1-2 days prior. For participants who miss appointments, we will limit the number of  
13 481 phone call attempts to 3-4 to respect privacy and the right to refuse. There may be special  
14 482 circumstances when outreach workers will be dispatched to participants' communities  
15 483 (with their prior consent) such as when calls do not go through.

16 484 We anticipate that we will lose a very small percentage of couples due to break-ups,  
17 485 deaths, and migration (<5%), which we have accounted for in recruitment and analysis  
18 486 plans. One assessment will be conducted with each partner separately following the  
19 487 break-up to understand when the couple broke up, whether study participation contributed  
20 488 to the break-up, and if not, other reasons for why the couple broke-up.

21 489 The breakup assessment will also allow us to identify any negative effects of participation  
22 490 on couples. If the study contributed to the break-up or the break-up was a negative  
23 491 experience, we will follow the adverse event logging process. We will continue to follow  
24 492 each partner individually and administer study assessments given that our study  
25 493 outcomes (e.g., alcohol use) are at the individual level. This will allow us to explore  
26 494 whether participation in the study, despite the break-up, had any effect on their alcohol  
27 495 use; however, couples who break-up before participation in the intervention will exit the  
28 496 study.

29 497

## 30 498 **Study outcomes**

### 31 499 ***Primary outcomes***

32 500 The primary goal of this pilot trial is to assess feasibility and acceptability (F&A) of  
33 501 *Masibambisane* using the following metrics and *a priori* targets: recruitment rate (number

of couples enrolled over six months; target: 120 couples), randomization rate (proportion of enrolled couples who are randomized; target: 90% of recruited couples), breathalyzer test completion rate (proportion of tests taken after prompted; target: 70%), satisfaction levels (proportion of couples who report being satisfied or very satisfied with *Masibambisane*: target: 75%), session completion rates (proportion of couples who attend 100% of sessions; target: 75%), and retention at 2-month and 6-month follow-up visits (proportion of couples who complete follow-up surveys; target: 85%). We will also assess fidelity to the intervention by having the manager or facilitators complete detailed checklists after each session to document activities conducted. As a second check, we will audio-record all sessions and have an independent research assistant listen to a subset of recordings and complete the same checklists. We set a target of 80% fidelity.

513

### 514 **Secondary outcomes**

515 Although we are not powered to examine treatment effects, we will explore the effect of  
516 *Masibambisane* on the alcohol use among the partner reporting hazardous alcohol use  
517 at baseline: number of drinking days in the past 30 days (assessed via the timeline follow-  
518 back), hazardous alcohol use (i.e., positive AUDIT-C score (40) in the past three months  
519 and/or a PEth value  $\geq 35$  ng/ml, a recommended cutoff value (54)), and raw AUDIT-C  
520 score (0-12); and among the partner with HIV: optimal ART adherence (95% or higher on  
521 the Visual Analog Scale/VAS (55)), and viral suppression (less than 1000 copies/ml per  
522 HIV clinical guidelines) (44).

523 Additional exploratory outcomes include relationship dynamics such as constructive  
524 communication (communication patterns questionnaire (56);  $\alpha=0.69-0.72$ ); alcohol-  
525 specific partner social support (adapted based on the social provision scale (57);  
526  $\alpha=0.84$ ), trust (dyadic trust scale (58);  $\alpha=0.82$ ), intimacy (emotional intimacy subscale  
527 of Sternberg love scale(59);  $\alpha=0.90$ ), unity (inclusion of self-in-other measure (60)),  
528 relationship satisfaction (couple satisfaction index (61), single item), and sexual  
529 satisfaction (couple sexual satisfaction scale (62);  $\alpha=0.89$ ). Because we expect that  
530 reductions in alcohol use and improvements in relationship dynamics may reduce IPV,  
531 we will also explore effects on physical, sexual, and emotional violence as measured by  
532 the WHO domestic violence module (63,64). All relationship dynamics and IPV types will  
533 be modelled as continuous variables.

## 534 **Sample size**

535 Formal tests of health outcomes or attempts to obtain valid estimates of effect sizes are  
536 not statistically justified for the proposed study (65–69). Pilot studies, by design, cannot  
537 definitively test hypotheses due to their smaller sample sizes and the frequent design  
538 adjustments necessary to maximize recruitment, retention and quality assessment of  
539 outcomes (65–69). Effect size estimates are not sufficiently reliable given the breadth of  
540 the confidence intervals; however, to supply additional information, we conducted several  
541 power analyses using NCSS PASS. In sum, our study is powered to detect small to  
542 medium distances to confidence limits for descriptive statistics and medium to large  
543 longitudinal analysis effects, though, as noted above, formal hypothesis testing will not  
544 be the focus of this pilot study.

545

## 546 **Data analysis plan**

### 547 ***Feasibility and acceptability data analysis***

548 The primary analyses will include descriptive statistics of F&A indicators, comparing each  
549 statistic (e.g., percent retained) to the threshold described above. Above-threshold  
550 findings will suggest a reasonable level of F&A while below-threshold findings would  
551 suggest that remedial modifications to study procedures and/or design would be required  
552 prior to moving forward with a full-scale trial. We will stratify the statistics by gender to  
553 consider sex as a biological variable.

554

### 555 ***Exploratory hypotheses and analyses***

556 Although the primary objective is to assess F&A rather than to conduct formal hypothesis  
557 tests, we will evaluate exploratory hypotheses as part of the assessment process. For  
558 example, we expect that: 1) participants in the MI-only arm will report a greater reduction  
559 in the number of drinking days and in lower odds of engaging in hazardous alcohol use  
560 than participants in the EUC control arm; 2) participants in the MI-plus arm will report a  
561 greater reduction in the number of drinking days and lower odds of engaging in hazardous  
562 alcohol use than participants in the MI-only arm. Secondly, we anticipate that  
563 intervention participants will report higher odds of adherence to ART and viral  
564 suppression than those in the EUC arm. We also anticipate the intervention participants  
565 in both arms will report higher (indicating more positive) scores on relationship dynamics  
566 and lower scores on IPV than those in the EUC arm.

1 567  
2 568 We will compute descriptive statistics to capture measures of central tendency for  
3 569 continuous variables and proportions for binary variables, by visit and by treatment arm.  
4 570 To explore the effect of *Masibambisane* on the secondary outcome of number of drinking  
5 571 days, we will use mixed-effects negative binomial regression models including all three  
6 572 timepoints. Negative binomial models are recommended for count-based outcomes like  
7 573 drinking days (70). For the AUDIT-C score, we will use linear mixed-effects models  
8 574 including all three timepoints. For optimal adherence to ART, we will use mixed-effects  
9 575 logistic regression models including all three timepoints. Models will include random  
10 576 effects for participants and couples, and fixed effects for timepoint and study arm,  
11 577 interaction of time and arm, and sex of the index patient. We will also explore the whether  
12 578 the effects are moderated by respondent type (i.e., index patient versus partner).

13 579 To explore effects on biomarker-based outcomes captured only at 2-months (e.g., heavy  
14 580 alcohol use, viral suppression) and only on index participants, we will use logistic  
15 581 regression models with treatment arm as the main predictor. For heavy alcohol use, which  
16 582 will be collected on both members of the couple, we will cluster based on couple ID to  
17 583 account for non-independent drinking levels within dual-drinking couples. All analyses will  
18 584 use an intent-to-treat approach to include every participant within the analysis based on  
19 585 their original randomization group. Statistical analyses will be conducted in Stata 18. If  
20 586 missing data exceeds 5%, we will use multiple imputation via chained equations following  
21 587 methods in our prior studies (71).

## 22 588 **Ethical considerations and dissemination**

### 23 589 ***Informed consent***

24 590 Participants will provide written informed consent for the following activities: 1) to  
25 591 participate in the second screening interview, which asks personal questions about IPV;  
26 592 2) to participate in the RCT and all procedures, including providing blood samples for  
27 593 PEth and viral load testing; and 3) to export alcohol biomarker DBS samples to the US  
28 594 laboratory for testing. Partners will be consented individually in a private interview room  
29 595 by a gender-matched interviewer in the isiZulu or English, depending on the participant's  
30 596 preference. The consent process will cover topics on the purpose of the study, study  
31 597 procedures, potential risks and benefits, how confidentiality will be ensured, voluntary  
32 598 participation, the funding agency and study investigators, and contact information for the

1 599 study PIs. The interviewer will go over all aspects of consent verbally and address any  
2 600 questions that the participant has about participation. We will capture signed consent  
3 601 using the REDCap mobile app. Participants will be given a paper copy of the consent  
4 602 forms. If participants are unable to read and write (as assessed by a brief reading  
5 603 comprehension tool), the interviewer will have a witness monitor the informed consent  
6 604 process and sign the consent form.  
7  
8  
9  
10

11 605

### 12 606 ***Confidentiality and privacy***

13 607 Participants may face a loss of confidentiality, which could lead to social stigma,  
14 608 discrimination, or physical and psychological harm due to their HIV status and alcohol  
15 609 use. To protect confidentiality, various measures will be taken, including staff training,  
16 610 using research identification numbers instead of names, and secure data storage. There  
17 611 is also a risk of loss of privacy, especially when discussing sensitive topics like HIV and  
18 612 alcohol use. Privacy will be maintained by using coded language and providing  
19 613 participants with strategies to protect their privacy, such as using discreet covers for  
20 614 breathalyzer devices and phones. Participants will be assured that their responses will  
21 615 not be shared with their partners, and steps will be taken to address coercion or violence,  
22 616 including referrals to appropriate services.  
23  
24  
25  
26  
27  
28  
29  
30  
31

32 617

### 33 618 ***Data safety and monitoring***

34 619 This study protocol was approved by the HSRC Research Ethics Committee (REC:  
35 620 Protocol Number 1/27/20/21), the UCSF Human Research Protection Program (HRPP;  
36 621 Protocol Number 21-35034) and is registered with Clinicaltrials.gov (NCT#05756790). A  
37 622 Data Safety and Monitoring Board (DSMB), composed of three independent experts in  
38 623 the field of HIV and alcohol abuse, has been convened in accordance with NIH policy.  
39 624 They reviewed and approved the study procedures for trial monitoring on November 15,  
40 625 2022. The DSMB will convene every six months and also in response to the occurrence  
41 626 of any serious adverse events. Data on anticipated adverse events, including couple  
42 627 dissolution and IPV, will be gathered throughout the study and reported to the DSMB at  
43 628 biannual meetings. Unanticipated events and events reported spontaneously will also be  
44 629 summarized and reported at the meetings.  
45  
46  
47  
48  
49  
50  
51  
52  
53

54 630

### 55 631 ***Trial modification and discontinuation***

1 632 Trial modifications will be allowed given that this is a pilot study designed to maximize  
2 633 feasibility and acceptability; however, major changes such as to eligibility criteria or key  
3 634 aspects of the trial design will require approval from the study sponsor and DSMB. In the  
4 635 case of major changes, amendments would be filed with the UCSF and HSRC institutional  
5 636 review boards and the clinicaltrials.gov record would be updated. Adverse events will be  
6 637 monitored by the DSMB, who could recommend pausing or halting of the study if needed.  
7 638 We have no plans to conduct any interim analyses for this small pilot study other than  
8 639 preliminary analyses of baseline data.

14 640

### 16 641 ***Ancillary and post-trial care***

18 642 Participants will be provided with a list of resources for community-based services for  
19 643 HIV, couples, and behavioral health at the start of the study. Participants who are flagged  
20 644 for suicidality, IPV, or serious mental health concerns will be referred by the research staff  
21 645 to *Lifeline* (i.e., a local organization that handles psychosocial or mental health issues and  
22 646 has expertise in couples counseling) or other mental health services. The research team  
23 647 will contact the service provider to set up an appointment and then inform the participant  
24 648 of their appointment schedule. The team will follow up with the participant later to ensure  
25 649 they were linked into services if they expressed an interest in obtaining help.

32 650

### 33 651 ***Dissemination***

35 652 Sharing of data and results generated by this project will be carried out in several ways.  
36 653 The study findings will be made available on clinicaltrials.gov. We will also deposit de-  
37 654 identified data in the US National Institute of Mental Health (NIMH) data archive (NDA)  
38 655 as required by the terms of the award. In collaboration with the HSRC community  
39 656 outreach team, results will be presented at local community meetings attended by  
40 657 participants and key stakeholders such as alcohol vendors. Results will also be presented  
41 658 at community-level meetings held by district and local health officials in collaboration with  
42 659 local HIV care clinics to ensure findings are disseminated to HIV policy makers. Finally,  
43 660 results will be presented at HIV and alcohol use conferences and published in peer-review  
44 661 journals with authorship based upon intellectual contribution and guided by American  
45 662 Psychological Association guidelines.

54 663

## 664 **Abbreviations**

665 SSA - Sub-Saharan Africa; PLWH - People Living with HIV; MI - Motivational Interviewing;  
666 BAC - Blood Alcohol Concentration; ART - Antiretroviral Therapy; HIV - Human  
667 Immunodeficiency Virus; F& A -Feasibility & Acceptability; IPV - Intimate Partner  
668 Violence; POC - Point-of-Care. EUC – Enhanced Usual Care; NIMH-National Institute of  
669 Mental Health. DSMB - Data Safety and Monitoring Board; HSRC- Human Sciences  
670 Research Council; USCF- University of California San Francisco; KZN - KwaZulu-Natal;  
671 TAC- Time-and-Attention Control; FGD – Focus Group Discussion; UNAIDS- The Joint  
672 United Nations Programmes on HIV/AIDS.

673

## 674 **Acknowledgements**

675 The authors would like to thank all the study participants for participating in this project,  
676 and the study staff at the Human Sciences Research Council.

677

## 678 **Authors' contributions**

679 AC serves as the principal investigator for the Masibambisane study and oversaw the  
680 completion of this manuscript. RB, LM, BC, and HH were contributing authors and served  
681 as project managers overseeing the implementation of the study protocol. TS, AvH, JH,  
682 and TN are study co-investigators. All authors have read and approved the final  
683 manuscript.

684

## 685 **Funding**

686 The Masibambisane RCT is funded by the US National Institute on Alcohol Abuse and  
687 Alcoholism (R34AA029649; PI Conroy) with additional support from grant  
688 K24AA022586 (PI Hahn). The funder had no role in study design and will not have any  
689 role during its execution, data analysis and interpretation, or dissemination of results.

## 690 **Availability of data and materials**

691 Please contact corresponding author for details. The data will be deposited in the National  
692 Institute of Mental Health (NIMH) Data Archive repository at regular intervals throughout  
693 the study.

694

695



1 696

2 697 **Declarations**

3 698

4 699 **Ethics approval and consent to participate**

7 700 All procedures were reviewed by the University of California San Francisco (UCSF)  
8 701 Human Research Protections Program and the Human Sciences Research Council  
9 702 (HSRC) Research Ethics Program.

12 703

14 704 **Consent for publication**

16 705 Not applicable.

18 706

19 707 **Competing interests**

21 708 The authors have no competing interests to disclose.

23 709

24 710 **Author details—copy from cover page**26 711 Lindani Msimango (MSoc. Sc.): [LIMsimango@hsrc.ac.za](mailto:LIMsimango@hsrc.ac.za)28 712 Rita Butterfield (PhD): [Rita.Butterfield@ucsf.edu](mailto:Rita.Butterfield@ucsf.edu)29 713 Alastair van Heerden (PhD): [avanheerden@hsrc.ac.za](mailto:avanheerden@hsrc.ac.za)31 714 Tyrel J. Starks (PhD): [tstarks@hunter.cuny.edu](mailto:tstarks@hunter.cuny.edu)32 715 Torsten B. Neiland (PhD): [torsten.neilands@ucsf.edu](mailto:torsten.neilands@ucsf.edu)33 716 Judith A. Hahn (PhD): [judy.hahn@ucsf.edu](mailto:judy.hahn@ucsf.edu)34 717 Buyisile Chibi (PhD): [BChibi@hsrc.ac.za](mailto:BChibi@hsrc.ac.za)35 718 Hilton Humphries (PhD): [HHumphries@hsrc.ac.za](mailto:HHumphries@hsrc.ac.za)36 719 Amy A. Conroy (PhD): [Amy.Conroy@ucsf.edu](mailto:Amy.Conroy@ucsf.edu)

1 720  
2  
3 721  
4 722  
5  
6 723  
7  
8 724  
9  
10 725  
11 726  
12  
13 727  
14 728  
15  
16 729  
17  
18 730  
19  
20 731  
21 732  
22  
23 733  
24  
25 734  
26 735  
27  
28 736  
29  
30 737  
31  
32 738  
33  
34 739  
35 740  
36  
37 741  
38  
39 742  
40  
41 743  
42 744  
43  
44 745  
45  
46 746  
47 747  
48  
49 748  
50  
51 749  
52  
53 750  
54 751  
55  
56 752  
57  
58  
59  
60

## References

1. Hahn JA, Woolf-King SE, Muyindike W. Adding fuel to the fire: Alcohol's effect on the HIV epidemic in sub-saharan africa. *Curr HIV/AIDS Rep.* 2011;8(3).
2. Hendershot CS, Stoner SA, Pantalone DW, Simoni JM. Alcohol use and antiretroviral adherence: Review and meta-analysis. Vol. 52, *Journal of Acquired Immune Deficiency Syndromes.* 2009.
3. Wu ES, Metzger DS, Lynch KG, Douglas SD. Association between alcohol use and HIV viral load. Vol. 56, *Journal of Acquired Immune Deficiency Syndromes.* 2011.
4. Shuper PA, Neuman M, Kanteres F, Baliunas D, Joharchi N, Rehm J. Causal considerations on alcohol and HIV/AIDS - A systematic review. Vol. 45, *Alcohol and Alcoholism.* 2010.
5. Baliunas D, Rehm J, Irving H, Shuper P. Alcohol consumption and risk of incident human immunodeficiency virus infection: A meta-analysis. In: *International Journal of Public Health.* 2010.
6. Human Sciences Research Council (HSRC), HSRC. The Fifth South African National HIV Prevalence, Incidence, Behaviour and Communication Survey, 2017: HIV Impact Assessment Summary Report. Cape Town, HSRC Press. 2018;2017(July).
7. World Health Organization. WHO Regions Country Profiles. In: *WHO Regions Country Profiles.* 2014.
8. Kekwaletswe CT, Morojele NK. Alcohol use, antiretroviral therapy adherence, and preferences regarding an alcohol-focused adherence intervention in patients with human immunodeficiency virus. *Patient Prefer Adherence.* 2014;8.
9. Kader R, Seedat S, Govender R, Koch JR, Parry CD. Hazardous and harmful use of alcohol and/or other drugs and health status among South African patients attending HIV clinics. *AIDS Behav.* 2014;18(3).
10. Parry CD, Londani M, Shuper PA, Myers B, Kekwaletswe CT, Nkosi S, et al. Characteristics and drinking behaviour of patients on antiretroviral therapy who drink and attend HIV clinics in Tshwane, South Africa: Implications for

- 1 753 intervention. *S Afr Med J*. 2019;109(10).
- 2 754 11. Devries KM, Mak JYT, García-Moreno C, Petzold M, Child JC, Falder G, et al.
- 3 755 The global prevalence of intimate partner violence against women. Vol. 340,
- 4 756 Science. 2013.
- 5 757 12. García-Moreno C, Pallitto C, Devries K, Stöckl H, Watts C, Abrahams N. Global
- 6 758 and regional estimates of violence against women: prevalence and health effects
- 7 759 of intimate partner violence and non-partner sexual violence. 2013.
- 8 760 13. Gass JD, Stein DJ, Williams DR, Seedat S. Gender differences in risk for intimate
- 9 761 partner violence among south african adults. *J Interpers Violence*. 2011;26(14).
- 10 762 14. Kalichman SC, Simbayi LC, Kaufman M, Cain D, Jooste S. Alcohol use and
- 11 763 sexual risks for HIV/AIDS in sub-saharan Africa: Systematic review of empirical
- 12 764 findings. Vol. 8, *Prevention Science*. 2007.
- 13 765 15. Magidson JF, Saal W, Nel A, Remmert JE, Kagee A. Relationship between
- 14 766 depressive symptoms, alcohol use, and antiretroviral therapy adherence among
- 15 767 HIV-infected, clinic-attending patients in South Africa. *J Health Psychol*.
- 16 768 2017;22(11).
- 17 769 16. Kekwaletswe CT, Morojele NK. Patterns and predictors of antiretroviral therapy
- 18 770 use among alcohol drinkers at HIV clinics in Tshwane, South Africa. *AIDS Care -*
- 19 771 *Psychol Socio-Medical Asp AIDS/HIV*. 2014;26(SUPPL. 1).
- 20 772 17. Cichowitz C, Maraba N, Hamilton R, Charalambous S, Hoffmann CJ. Depression
- 21 773 and alcohol use disorder at antiretroviral therapy initiation led to disengagement
- 22 774 from care in South Africa. *PLoS One*. 2017;12(12).
- 23 775 18. Conroy AA, McKenna SA, Ruark A. Couple Interdependence Impacts Alcohol Use
- 24 776 and Adherence to Antiretroviral Therapy in Malawi. *AIDS Behav*. 2019;23(1).
- 25 777 19. Conroy AA, McKenna SA, Leddy A, Johnson MO, Ngubane T, Darbes LA, et al.
- 26 778 "If She is Drunk, I Don't Want Her to Take it": Partner Beliefs and Influence on
- 27 779 Use of Alcohol and Antiretroviral Therapy in South African Couples. *AIDS Behav*.
- 28 780 2017;21(7).
- 29 781 20. Conroy AA, Ruark A, McKenna SA, Tan JY, Darbes LA, Hahn JA, et al. The
- 30 782 Unaddressed Needs of Alcohol-Using Couples on Antiretroviral Therapy in
- 31 783 Malawi: Formative Research on Multilevel Interventions. *AIDS Behav*. 2020;24(6).
- 32 784 21. Starks TJ, Millar BM, Doyle KM, Bertone P, Ohadi J, Parsons JT. Motivational
- 33 785 interviewing with couples: A theoretical framework for clinical practice illustrated in

- 1 786 substance use and HIV prevention intervention with gay male couples. *Psychol*  
2 787 *Sex Orientat Gend Divers*. 2018;5(4).
- 3  
4 788 22. Wandera B, Tumwesigye NM, Nankabirwa JI, Mafigiri DK, Parkes-Ratanshi RM,  
5 789 Kapiga S, et al. Efficacy of a Single, Brief Alcohol Reduction Intervention among  
6 790 Men and Women Living with HIV/AIDS and Using Alcohol in Kampala, Uganda: A  
7 791 Randomized Trial. *J Int Assoc Provid AIDS Care*. 2017;16(3).
- 8  
9 792 23. Murphy DA, Chen X, Naar-King S, Parsons JT. Alcohol and marijuana use  
10 793 outcomes in the healthy choices motivational interviewing intervention for HIV-  
11 794 positive youth. *AIDS Patient Care STDS*. 2012;26(2).
- 12  
13 795 24. Velasquez MM, von Sternberg K, Johnson DH, Green C, Carbonari JP, Parsons  
14 796 JT. Reducing Sexual Risk Behaviors and Alcohol Use Among HIV-Positive Men  
15 797 Who Have Sex With Men: A Randomized Clinical Trial. *J Consult Clin Psychol*.  
16 798 2009;77(4).
- 17  
18 799 25. Naar-King S, Wright K, Parsons JT, Frey M, Templin T, Lam P, et al. Healthy  
19 800 choices: Motivational enhancement therapy for health risk behaviors in HIV-  
20 801 positive youth. *AIDS Educ Prev*. 2006;18(1).
- 21  
22 802 26. Naar-King S, Lam P, Wang B, Wright K, Parsons JT, Frey MA. Brief report:  
23 803 Maintenance of effects of motivational enhancement therapy to improve risk  
24 804 behaviors and HIV-related health in a randomized controlled trial of youth living  
25 805 with HIV. *J Pediatr Psychol*. 2008;33(4).
- 26  
27 806 27. Hasin DS, Aharonovich E, O'Leary A, Greenstein E, Pavlicova M, Arunajadai S, et  
28 807 al. Reducing heavy drinking in HIV primary care: A randomized trial of brief  
29 808 intervention, with and without technological enhancement. *Addiction*. 2013;108(7).
- 30  
31 809 28. Hasin DS, Aharonovich E, Greenstein E. HealthCall for the smartphone:  
32 810 Technology enhancement of brief intervention in HIV alcohol dependent patients.  
33 811 *Addict Sci Clin Pract*. 2014;9(1).
- 34  
35 812 29. Kahler CW, Pantalone DW, Mastroleo NR, Liu T, Bove G, Ramratnam B, et al.  
36 813 Motivational interviewing with personalized feedback to reduce alcohol use in  
37 814 HIV-infected men who have sex with men: A randomized controlled trial. *J*  
38 815 *Consult Clin Psychol*. 2018;86(8).
- 39  
40 816 30. Miller, William R, Steven R. *Motivational interviewing: Helping people change &*  
41 817 *grow*. 4th ed. Guilford Press; 2023.
- 42  
43 818 31. Robles G, Bosco SC, Dellucci T V., Starks TJ. *Integrating Intra-Individual and*

- 1 819 Dyadic Factors in Examining Health Among Gay and Bisexual Men: A Narrative  
2 820 Review of Recent Literature. Vol. 16, Journal of GLBT Family Studies. 2020.
- 3 821 32. Starks TJ, Dellucci T V., Gupta S, Robles G, Stephenson R, S. Sullivan P, et al. A  
4 822 Pilot Randomized Trial of Intervention Components Addressing Drug Use in  
5 823 Couples HIV Testing and Counseling (CHTC) with Male Couples. AIDS Behav.  
6 824 2019;23(9).
- 7 825 33. Starks TJ, Robles G, Doyle KM, Pawson M, Bertone P, Millar BM, et al.  
8 826 Motivational interviewing with male couples to reduce substance use and hiv risk:  
9 827 Manifestations of partner discord and strategies for facilitating dyadic functioning.  
10 828 Psychotherapy. 2020;57(1).
- 11 829 34. Starks TJ. Motivational interviewing with couples: A framework for behavior  
12 830 change developed with sexual minority men. . Oxford University Press; 2022.
- 13 831 35. Starks TJ, Cruse C, Bosco S., Ingersoll K. Client perceptions of couples  
14 832 motivational interviewing: A qualitative examination of male couples' statements  
15 833 to counselor in session. Couns Psychother Res . 2023;
- 16 834 36. Starks TJ, Adebayo T, Kyre KD, Millar BM, Stratton MJ, Gandhi M, et al. Pilot  
17 835 Randomized Controlled Trial of Motivational Interviewing with Sexual Minority  
18 836 Male Couples to Reduce Drug Use and Sexual Risk: The Couples Health Project.  
19 837 AIDS Behav. 2022;26(2).
- 20 838 37. Wang Y. Real-time assessment of alcohol use: The potential of wrist-worn alcohol  
21 839 biosensor. In: Oral presentation given at the NIAAA ART/PrEP Meeting.  
22 840 Bethesda, MA; 2019.
- 23 841 38. Lauckner C. Harnessing mHealth Technologies to Deliver a Behavioral Alcohol  
24 842 Reduction Intervention: The TRAC Study. In: Oral presentation given at the  
25 843 NIAAA ART/PrEP Meeting. Bethesda, MA;
- 26 844 39. Fairbairn CE, Kang D. Temporal Dynamics of Transdermal Alcohol Concentration  
27 845 Measured via New-Generation Wrist-Worn Biosensor. Alcohol Clin Exp Res  
28 846 [Internet]. 2019 Oct 30;43(10):2060–9. Available from:  
29 847 <https://onlinelibrary.wiley.com/doi/10.1111/acer.14172>
- 30 848 40. Bush K, Kivlahan DR, McDonell MB, Fihn SD, Bradley KA. The AUDIT alcohol  
31 849 consumption questions (AUDIT-C): An effective brief screening test for problem  
32 850 drinking. Arch Intern Med. 1998;158(16).
- 33 851 41. Ellsberg M, Heise L, Peña R, Agurto S, Winkvist A. Researching domestic

- 1 852 violence against women: Methodological and ethical considerations. *Stud Fam*  
2 853 *Plann.* 2001;32(1).
- 3  
4 854 42. Wingood GM, Diclemente RJ. The ADAPT-ITT model: A novel method of  
5  
6 855 adapting evidence-based HIV interventions. *J Acquir Immune Defic Syndr.*  
7 856 2008;47(SUPPL. 1):40–6.
- 8  
9 857 43. Miller WR, C'de Baca J, Matthews DB, Wilbourne PL. Personal Values Card Sort.  
10 858 *Univ New Mex.* 2001;
- 11  
12 859 44. Republic of South Africa National Department of Health. 2019 ART Clinical  
13 860 Guidelines for the Management of HIV in Adults, Pregnancy, Adolescents,  
14 861 Children, Infants and Neonates. 2019.
- 15  
16 862 45. Conroy AA, Tebbetts S, Darbes LA, Hahn JA, Neilands TB, McKenna SA, et al.  
17 863 Development of an Economic and Relationship-Strengthening Intervention for  
18 864 Alcohol Drinkers Living with HIV in Malawi. *AIDS Behav.* 2023;27(7).
- 19  
20 865 46. Silverman HJ, Miller FG. Control group selection in critical care randomized  
21 866 controlled trials evaluating interventional strategies: An ethical assessment. Vol.  
22 867 32, *Critical Care Medicine.* 2004.
- 23  
24 868 47. Vickers AJ, De Craen AJM. Why use placebos in clinical trials? A narrative review  
25 869 of the methodological literature. *J Clin Epidemiol.* 2000;53(2).
- 26  
27 870 48. McMahon JM, Tortu S, Torres L, Pouget ER, Hamid R. Recruitment of  
28 871 heterosexual couples in public health research: A study protocol. *BMC Med Res*  
29 872 *Methodol.* 2003;3.
- 30  
31 873 49. Woolf-King SE, Conroy AA, Fritz K, Johnson MO, Hosegood V, van Rooyen H, et  
32 874 al. Alcohol use and relationship quality among South African couples. *Subst Use*  
33 875 *Misuse.* 2019;54(4).
- 34  
35 876 50. Perilli M, Toselli F, Franceschetto L, Cinquetti A, Ceretta A, Cecchetto G, et al.  
36 877 Phosphatidylethanol (PEth) in Blood as a Marker of Unhealthy Alcohol Use: A  
37 878 Systematic Review with Novel Molecular Insights. Vol. 24, *International Journal of*  
38 879 *Molecular Sciences.* 2023.
- 39  
40 880 51. Ulwelling W, Smith K. The PEth Blood Test in the Security Environment: What it  
41 881 is; Why it is Important; and Interpretative Guidelines. Vol. 63, *Journal of Forensic*  
42 882 *Sciences.* 2018.
- 43  
44 883 52. Jones J, Jones M, Plate C, Lewis D. The detection of 1-palmitoyl-2-oleoyl-sn-  
45 884 glycerol-3-phosphoethanol in human dried blood spots. *Anal Methods.* 2011;3(5).

- 1 885 53. Hahn JA, Dobkin LM, Mayanja B, Emenyonu NI, Kigozi IM, Shiboski S, et al.  
2 886 Phosphatidylethanol (PEth) as a Biomarker of Alcohol Consumption in HIV-  
3 887 Positive Patients in Sub-Saharan Africa. *Alcohol Clin Exp Res.* 2012;36(5):854–  
4 888 62.
- 5 889 54. Helander A, Hansson T. [National harmonization of the alcohol biomarker PEth].  
6 890 *Lakartidningen.* 110(39–40):1747–8.
- 7 891 55. Conroy AA, McKenna S, Ruark A, Neilands TB, Spinelli M, Gandhi M.  
8 892 Relationship Dynamics are Associated with Self-Reported Adherence but not an  
9 893 Objective Adherence Measure in Malawi. *AIDS Behav.* 2022;26(11).
- 10 894 56. Christensen A, Shenk JL. Communication, Conflict, and Psychological Distance in  
11 895 Nondistressed, Clinic, and Divorcing Couples. *J Consult Clin Psychol.* 1991;59(3).
- 12 896 57. Carolyn E. Cutrona, Weiss R. THE PROVISIONS OF SOCIAL RELATIONSHIPS  
13 897 AND ADAPTATION TO STRESS. *Adv Pers relationships.* 1974;1(1).
- 14 898 58. Larzelere RE, Huston TL. The Dyadic Trust Scale: Toward Understanding  
15 899 Interpersonal Trust in Close Relationships. *J Marriage Fam.* 1980;42(3).
- 16 900 59. Sternberg RJ. Construct validation of a triangular love scale. *Eur J Soc Psychol.*  
17 901 1997;27(3).
- 18 902 60. Aron A, Aron EN, Tudor M, Nelson G. Close Relationships as Including Other in  
19 903 the Self. *J Pers Soc Psychol.* 1991;60(2).
- 20 904 61. Funk JL, Rogge RD. Testing the Ruler With Item Response Theory: Increasing  
21 905 Precision of Measurement for Relationship Satisfaction With the Couples  
22 906 Satisfaction Index. *J Fam Psychol.* 2007;21(4).
- 23 907 62. Conroy AA, Ruark A, Neilands TB, Darbes LA, Johnson MO, Tan JY, et al.  
24 908 Development and Validation of the Couple Sexual Satisfaction Scale for HIV and  
25 909 Sexual Health Research. *Arch Sex Behav.* 2021;50(7).
- 26 910 63. WHO. WHO Multi-country Study on Women's Health and Domestic Violence:  
27 911 Core Questionnaire and WHO Instrument. Geneva, Switzerland; 2005.
- 28 912 64. Jewkes R, Dunkle K, Nduna M, Levin J, Jama N, Khuzwayo N, et al. Factors  
29 913 associated with HIV sero-status in young rural South African women: Connections  
30 914 between intimate partner violence and HIV. *Int J Epidemiol.* 2006;35(6).
- 31 915 65. Kraemer HC, Mintz J, Noda A, Tinklenberg J, Yesavage JA. Caution regarding  
32 916 the use of pilot studies to guide power calculations for study proposals. Vol. 63,  
33 917 *Archives of General Psychiatry.* 2006.

- 1 918 66. NIH/NCCIH. [https://nccih.nih.gov/grants/whatnccihfunds/pilot\\_studies](https://nccih.nih.gov/grants/whatnccihfunds/pilot_studies). 2017. Pilot  
2 919 Studies: Common Uses and Misuses.  
3  
4 920 67. Leon AC, Davis LL, Kraemer HC. The role and interpretation of pilot studies in  
5 clinical research. *J Psychiatr Res*. 2011;45(5).  
6 921  
7 922 68. Moore CG, Carter RE, Nietert PJ, Stewart PW. Recommendations for planning  
8 pilot studies in clinical and translational research. Vol. 4, *Clinical and translational*  
9 *science*. 2011.  
10 923  
11 924  
12 925 69. Thabane L, Ma J, Chu R, Cheng J, Ismaila A, Rios LP, et al. A tutorial on pilot  
13 studies: The what, why and how. Vol. 10, *BMC Medical Research Methodology*.  
14 926 2010.  
15 927  
16 928 70. Horton NJ, Kim E, Saitz R. A cautionary note regarding count models of alcohol  
17 consumption in randomized controlled trials. *BMC Med Res Methodol*. 2007;7.  
18 929  
19 930 71. Conroy AA. The influence of relationship power dynamics on HIV testing in rural  
20 Malawi. *J Sex Res*. 2015;52(3).  
21 931  
22 932  
23 933  
24  
25  
26  
27  
28  
29  
30  
31  
32  
33  
34  
35  
36  
37  
38  
39  
40  
41  
42  
43  
44  
45  
46  
47  
48  
49  
50  
51  
52  
53  
54  
55  
56  
57  
58  
59  
60



# BMJ Open

## Couples Motivational Interviewing with Mobile Breathalyzers to Reduce Alcohol Use in South Africa: A Pilot Randomized Controlled Trial of Masibambisane

|                                 |                                                                                                                                                                                                                                                                                                                                                                                                                                                                                                                                                                                                                                                                                                                                                                                                                                                                                                                                                                                                                                                                                                                                   |
|---------------------------------|-----------------------------------------------------------------------------------------------------------------------------------------------------------------------------------------------------------------------------------------------------------------------------------------------------------------------------------------------------------------------------------------------------------------------------------------------------------------------------------------------------------------------------------------------------------------------------------------------------------------------------------------------------------------------------------------------------------------------------------------------------------------------------------------------------------------------------------------------------------------------------------------------------------------------------------------------------------------------------------------------------------------------------------------------------------------------------------------------------------------------------------|
| Journal:                        | <i>BMJ Open</i>                                                                                                                                                                                                                                                                                                                                                                                                                                                                                                                                                                                                                                                                                                                                                                                                                                                                                                                                                                                                                                                                                                                   |
| Manuscript ID                   | bmjopen-2023-083390.R1                                                                                                                                                                                                                                                                                                                                                                                                                                                                                                                                                                                                                                                                                                                                                                                                                                                                                                                                                                                                                                                                                                            |
| Article Type:                   | Protocol                                                                                                                                                                                                                                                                                                                                                                                                                                                                                                                                                                                                                                                                                                                                                                                                                                                                                                                                                                                                                                                                                                                          |
| Date Submitted by the Author:   | 16-Jan-2024                                                                                                                                                                                                                                                                                                                                                                                                                                                                                                                                                                                                                                                                                                                                                                                                                                                                                                                                                                                                                                                                                                                       |
| Complete List of Authors:       | Msimango, Lindani; Human Sciences Research Council, Centre for Community Based Research<br>Butterfield, Rita; University of California San Francisco, Department of Medicine<br>Starks , Tyrel ; City University of New York, Hunter College, Department of Psychology<br>van Heerden , Alastair ; Human Sciences Research Council, Centre for Community Based Research; University of the Witwatersrand Johannesburg Faculty of Health Sciences<br>Neilands, Torsten; University of California San Francisco, Center for AIDS Prevention Studies, Division of Prevention Sciences, Department of Medicine<br>Hahn, JA; University of California San Francisco, Department of Medicine, Department of Epidemiology & Biostatistics<br>Chibi, Buyisile; Human Sciences Research Council, Centre for Community Based Research<br>Humphries, Hilton; Human Sciences Research Council, Centre for Community Based Research; University of KwaZulu-Natal, Department of Psychology<br>Conroy, Amy; University of California San Francisco, Center for AIDS Prevention Studies, Division of Prevention Sciences, Department of Medicine |
| <b>Primary Subject Heading</b>: | HIV/AIDS                                                                                                                                                                                                                                                                                                                                                                                                                                                                                                                                                                                                                                                                                                                                                                                                                                                                                                                                                                                                                                                                                                                          |
| Secondary Subject Heading:      | Addiction                                                                                                                                                                                                                                                                                                                                                                                                                                                                                                                                                                                                                                                                                                                                                                                                                                                                                                                                                                                                                                                                                                                         |
| Keywords:                       | Behavior, HIV & AIDS < INFECTIOUS DISEASES, Medication Adherence, Substance misuse < PSYCHIATRY, Social Support                                                                                                                                                                                                                                                                                                                                                                                                                                                                                                                                                                                                                                                                                                                                                                                                                                                                                                                                                                                                                   |
|                                 |                                                                                                                                                                                                                                                                                                                                                                                                                                                                                                                                                                                                                                                                                                                                                                                                                                                                                                                                                                                                                                                                                                                                   |

SCHOLARONE™  
Manuscripts

1 **Couples Motivational Interviewing with Mobile Breathalyzers to Reduce Alcohol**  
2 **Use in South Africa: A Pilot Randomized Controlled Trial of Masibambisane**

3  
4  
5  
6  
7  
8 **Authors:** Lindani Msimango<sup>1</sup>, Rita Butterfield<sup>2</sup>, Tyrel J. Starks<sup>3,4</sup>, Alastair van Heerden<sup>1,5</sup>,  
9  
10 Torsten B. Neilands<sup>2</sup>, Judith A. Hahn<sup>6</sup>, Buyisile Chibi<sup>1</sup>, Hilton Humphries<sup>1,7</sup>, Amy A.  
11  
12 Conroy<sup>2</sup>  
13

14 **Affiliations:**

- 15  
16  
17 1. Human Sciences Research Council, Centre for Community Based Research,  
18 KwaZulu-Natal, South Africa  
19  
20 2. Center for AIDS Prevention Studies, Division of Prevention Sciences, Department  
21 of Medicine, University of California San Francisco, CA, USA  
22  
23 3. Department of Psychology, Hunter College of the City University of New York  
24 (CUNY), New York, NY, USA  
25  
26 4. Doctoral Program in Health Psychology and Clinical Science, Graduate Center of  
27 CUNY, New York, NY, USA  
28  
29 5. MRC/WITS Developmental Pathways for Health Research Unit, Department of  
30 Paediatrics, Faculty of Health Science, University of the Witwatersrand,  
31 Johannesburg, South Africa  
32  
33 6. Department of Medicine, and Department of Epidemiology & Biostatistics,  
34 University of California, San Francisco  
35  
36 7. Department of Psychology, University of KwaZulu-Natal, Pietermaritzburg, South  
37 Africa  
38  
39  
40  
41  
42  
43

44 Corresponding author:

45 Amy A. Conroy, PhD, MPH  
46  
47 University of California San Francisco  
48  
49 Center for AIDS Prevention Studies  
50  
51 550 16<sup>th</sup> Street, San Francisco, CA 94158  
52  
53  
54 [amy.conroy@ucsf.edu](mailto:amy.conroy@ucsf.edu)  
55  
56  
57  
58  
59  
60

1 30

2  
3 **Abstract**4  
5 **Introduction:**

6  
7 33 Heavy alcohol use among people living with HIV in sub-Saharan Africa can hinder the  
8  
9 34 success of HIV treatment programs, impacting progress towards UNAIDS goals. Primary  
10  
11 35 partners can provide critical forms of social support to reduce heavy drinking and could  
12  
13 36 be included in motivational interviewing (MI) interventions to address heavy drinking;  
14  
15 37 however, few studies have evaluated MI interventions for couples living with HIV in sub-  
16  
17 38 Saharan Africa. We aim to evaluate the feasibility and acceptability of a couple-based MI  
18  
19 39 intervention with mobile breathalyzer technology to reduce heavy alcohol use and  
20  
21 40 improve HIV treatment outcomes among HIV-affected couples in South Africa.

22  
23 **Methods and analysis:**

24  
25 43 We will employ a three-arm randomized controlled trial to assess the efficacy of couple-  
26  
27 44 based MI (MI-only arm) and in conjunction with mobile breathalyzers (MI-plus arm) to  
28  
29 45 address alcohol use and HIV outcomes, as compared to enhanced usual care (control  
30  
31 46 arm). We will enroll heterosexual couples aged 18-49 in a primary relationship for at least  
32  
33 47 six months who have at least one partner reporting hazardous alcohol use and on  
34  
35 48 antiretroviral therapy for six months. Participants in both MI arms will attend three  
36  
37 49 manualized counselling sessions and those in the MI-plus arm will receive real-time  
38  
39 50 feedback on blood alcohol concentration (BAC) levels using a mobile breathalyzer.  
40  
41 51 Couples randomized in the control arm will receive enhanced usual care based on the  
42  
43 52 South African ART Clinical Guidelines. Feasibility and acceptability indicators will be  
44  
45 53 analyzed descriptively, and exploratory hypotheses will be examined through regression  
46  
47 54 models considering timepoints and treatment arms.

48  
49 **Ethics and dissemination:**

50  
51 58 The study was approved by the University of California, San Francisco (HRPP; Protocol  
52  
53 59 Number 21-35034) and HSRC Research Ethics Committee (REC: Protocol Number  
54  
55 60 1/27/20/21). We will disseminate the results at local community meetings, community-  
56  
57 61 level health gatherings, and conferences focused on HIV and alcohol use.

1 62  
2  
3 63  
4 64  
5  
6 65  
7  
8 66  
9  
10 67  
11  
12 68  
13 69  
14  
15 70  
16  
17 71  
18  
19 72  
20  
21 73  
22 74  
23  
24  
25 75  
26  
27 76  
28 77  
29 78  
30  
31  
32 79  
33  
34 80  
35  
36  
37  
38  
39  
40  
41  
42  
43  
44  
45  
46  
47  
48  
49  
50  
51  
52  
53  
54  
55  
56  
57  
58  
59  
60

### **Strengths and limitations of this study**

- Intervention was developed and tailored to the cultural context of heterosexual couples in a rural setting of KwaZulu-Natal
- Uses a dyadic approach to intervene to collect and analyse intervention effects on both partners
- Incorporates an alcohol biomarker to mitigate the limitations of self-reported drinking behavior
- Small pilot study not powered to detect changes in behavioral outcomes
- Relatively short follow-up period of six months does not allow for the assessment of long-term health effects

**Trial registration:** ClinicalTrials.gov Protocol Registration; NCT05756790; registered on March 6, 2023; <https://register.clinicaltrials.gov/>

**Protocol Version 1.0:** 19 December 2023

**Keywords:** Motivational interviewing with couples; heavy alcohol use; HIV/AIDS; antiretroviral therapy; South Africa

## 81 Introduction

### 82 *Background*

83 In sub-Saharan Africa (SSA), alcohol use is described as “adding fuel to the fire” for  
84 people living with HIV (PLWH) (1), threatening the success of HIV treatment programs  
85 and progress towards United Nations Programme on HIV/AIDS (UNAIDS) goals (2–5).  
86 South Africa is severely impacted by HIV, particularly in KwaZulu-Natal (KZN) where 27%  
87 of adults are infected with HIV (6). At 11 liters of pure alcohol per year, South Africa has  
88 some of the highest levels of per capita drinking in the world (7). Among PLWH who drink  
89 in South Africa, 50-90% report heavy alcohol use (8–10). Notably, South Africa also has  
90 some of the highest rates of gender-based violence worldwide (11,12), which is closely  
91 linked to heavy alcohol use (13,14). For PLWH, alcohol use contributes to poor adherence  
92 to antiretroviral therapy (ART) and retention in HIV care (15–17).

93 Our research in SSA suggests that primary partners are key to the success of alcohol  
94 interventions given their critical role in helping people reduce alcohol use and the couple  
95 dynamics that intersect with alcohol use (18–21). In South Africa, partners mitigate the  
96 harms of alcohol use by helping drinkers manage their alcohol use while maintaining  
97 adherence to ART (19); however, communication around reducing alcohol use is not  
98 always effective and can be limited by gender-based power imbalances. This suggests  
99 the need for interventions to build couples’ communication skills and shared decision-  
100 making around alcohol use (20). Harnessing this powerful form of social support is critical  
101 in a setting where clinical services for alcohol misuse are inadequate and can be costly  
102 for patients.

103 One approach that has been effective at reducing alcohol use among PLWH is  
104 motivational interviewing (MI) in conjunction with mobile technology for real-time feedback  
105 on drinking levels (22–29). MI is a collaborative, goal-oriented style of communication  
106 with particular attention to the language of change (30). It is designed to strengthen  
107 personal motivation for and commitment to a specific goal by eliciting and exploring the  
108 person’s own reasons for change in an atmosphere of acceptance and compassion (30).  
109 Few MI approaches with couples have been developed for alcohol use, particularly in the  
110 African context (21,31–33). Although Starks articulated a comprehensive framework for  
111 MI practice with couples (34), most of the research on feasibility and acceptability (21,35),

1 112 and preliminary efficacy (32,36) of the approach has come from the study of male couples  
2 113 in the US.

3  
4  
5 114 In studies with individuals, daily monitoring of drinking levels, when paired with MI, has a  
6  
7 115 greater effect on drinking than MI alone (27–29) and we hypothesize that monitoring may  
8  
9 116 have additional benefits with couples. Although primary partners are generally aware of  
10  
11 117 a person's alcohol use, they may have inaccurate knowledge of drinking amounts and  
12  
13 118 frequency if not drinking together. Accurate knowledge of drinking levels in real-time is  
14  
15 119 critical to trigger couples' communication as well as timely and tailored social support.  
16  
17 120 Mobile breathalyzers have been shown to be a feasible and acceptable strategy for self-  
18  
19 121 monitoring alcohol use in studies with individuals and new products have been developed  
20  
21 122 for dyads that allow for sharing of blood alcohol concentration (BAC) levels with support  
22  
23 123 partners via a mobile app (37–39). In sum, mobile breathalyzers can provide real-time  
24  
25 124 feedback and support, which can be synergistic with an MI approach with couples that  
26  
27 125 fosters couple communication and problem-solving skills to effectively engage with the  
28  
29 126 breathalyzers and work together to reduce alcohol use.

### 30 127 **Objectives**

31 128 The main aim of this study is to evaluate the feasibility and acceptability (F&A) of a  
32  
33 129 couples-based intervention for heavy alcohol consumption among HIV-affected couples  
34  
35 130 (*Masibambisane*, “Let's work together” in *isiZulu*). Our primary hypothesis is that  
36  
37 131 *Masibambisane* will be feasible and acceptable. As exploratory hypotheses, we expect  
38  
39 132 that participants who receive the intervention will report lower number of drinking days  
40  
41 133 and heavy alcohol use (a combined measure of self-report and an alcohol biomarker),  
42  
43 134 and greater rates of viral suppression and adherence to ART at follow-up visits.

### 44 135 **Methods and analysis**

#### 45 136 **Trial design**

46  
47 137 We will conduct a three-arm randomized controlled trial (RCT) with couples randomized  
48  
49 138 to the following arms: 1) an enhanced usual care (EUC) control condition; 2) couple-  
50  
51 139 based MI (MI-only arm); and 3) couple-based MI with mobile breathalyzers (MI-plus arm).  
52  
53 140 Couples in arm 2 and 3 will receive three MI sessions over a 60-day period with an  
54  
55 141 experienced counselor to help strengthen communication and problem-solving skills  
56  
57 142 around alcohol use. Couples in Arm 3 will use a mobile breathalyzer and app for 60 days

1 144 and receive the same MI sessions, which will incorporate feedback on BAC results into  
2 145 the sessions. This design will allow us to assess the efficacy of couple-based MI alone  
3 146 and the added synergistic effect of the mobile breathalyzers on alcohol use and HIV  
4 147 outcomes (e.g., adherence to ART, viral suppression).  
5  
6  
7

8 148

### 9 149 **Study setting**

11 150 The *Masibambisane* study will be conducted by the Human Sciences Research Council  
12 151 (HSRC) in the Sweetwaters community, a rural area west of the capital of KwaZulu-Natal,  
13 152 Pietermaritzburg, South Africa.  
14  
15

16 153

### 18 154 **Eligibility criteria**

19 155 Couples will be included in the study if they are: (1) in a primary relationship for at least  
20 156 six months; (2) aged 18-49; (3) have at least one partner (the “index patient”) with a  
21 157 positive AUDIT-C screen (score of 3 or more for women and 4 for of more for men;  
22 158 modified to cover the prior 3 months) (40) and on ART for at least six months. We expect  
23 159 all participants to be on oral ART regimens as long-acting ART was not available at the  
24 160 time of this study in South Africa. All participants living with HIV will be required to have  
25 161 disclosed their HIV status to their partner in the study. Lastly, both partners will separately  
26 162 agree to participate in order for the couple to be enrolled.  
27  
28  
29

30 163

31 164 We will exclude participants with an AUDIT-C score greater than 12, indicating risk of  
32 165 severe alcohol use disorder. Participants with severe drinking issues may not benefit from  
33 166 a short-term counseling-based intervention and may need more intensive treatment than  
34 167 our study can provide. Our intervention may also not be appropriate for couples  
35 168 experiencing severe intimate partner violence (IPV). Thus, we will exclude those who fear  
36 169 for their safety by participating in the study and/or report severe IPV in the past 3 months.  
37 170 IPV is assessed using the WHO measure for South Africa, which assesses physical,  
38 171 sexual, and emotional violence, and determines whether it is mild, moderate, or severe  
39 172 (41). This trial does not place restrictions on concomitant receipt of care for alcohol use  
40 173 or HIV care and treatment.  
41  
42  
43  
44  
45  
46  
47  
48  
49  
50  
51

52 174

53 175

54 176

## 187 **Patient and public involvement**

188 We adapted the *Masibambisane* intervention from the 3-session couples MI intervention  
189 protocol originally developed by Starks et al. for use in the *Couples Health Project* (36).  
190 The original intervention was intended to reduce drug use and enhance primary HIV  
191 prevention among male couples in the US. In contrast, the *Masibambisane* intervention  
192 will address heavy alcohol use among heterosexual couples in South Africa in which at  
193 least one partner is living with HIV. The adaptation process therefore had to consider: 1)  
194 cultural and linguistic context; 2) reformulation of the new target behavior (i.e., to heavy  
195 alcohol use); and, 3) integration of the mobile breathalyzer component.

196 We followed the ADAPT-ITT framework (42) to arrive at the final version of the  
197 *Masibambisane* intervention. Consistent with step 5 in the ADAPT-ITT framework, we  
198 conducted focus group discussions (FGDs) with 36 key stakeholders to gain feedback on  
199 the intervention content and activities, including perceptions of the mobile breathalyzer  
200 technology. Key stakeholders included HIV care providers, alcohol vendors, community  
201 leaders, and couples who drink alcohol. This feedback was integrated in the creation of  
202 a modified intervention manual (ADAPT-ITT step 6). The revised manual was reviewed  
203 by 8 members of the research team during the intervention training process (ADAPT-ITT  
204 step 7) – including the counselors who would deliver the intervention. Their feedback was  
205 used to refine and finalize the *Masibambisane* manual to maximize usability and enhance  
206 cultural relevance.

## 207 ***Masibambisane* intervention arms**

208 Participants in the MI-only and MI-plus arms will receive three in-person manualized MI  
209 sessions as a couple with a trained counselor in the language of their preference (either  
210 *isiZulu* or English). Sessions take place approximately 30 days apart over a period of 2  
211 months. In addition, the index participant in the MI-plus arm will make use of the mobile  
212 breathalyzer and companion app, which will deliver real-time feedback on the index  
213 participant's BAC levels to both partners for two months. The couples randomized to MI-  
214 plus will receive brief technology training on how to operate the mobile breathalyzer and  
215 app followed by a short trial period to become familiar with the technology before starting  
216 intervention activities. All sessions are conducted with both partners together and each  
217 lasts 60 to 75 minutes. The manual will provide guidance on sequencing of content. It is



1 210 executed in a manner consistent with the spirit, processes, and techniques of couples MI  
2 211 outlined by Starks (34,36).  
3  
4 212

5  
6 213 **Session 1.** The counselor first orients the couple to the structure and nature of the  
7 214 intervention and reminds them about the limits of confidentiality. After initial engagement  
8 215 and rapport building, the counselor invites the couple to reflect on communication  
9 216 strengths and weaknesses before engaging in strengths-based communication skill  
10 217 building. The topic of alcohol use is introduced through the use of a calendar activity  
11 218 developed for Dr. Starks' previous studies (32,36). Partners who report heavy alcohol use  
12 219 at baseline complete the calendar by indicating days they consumed alcohol in the past  
13 220 30 days. This serves as an immediate feedback tool that the counselor uses to catalyze  
14 221 a conversation about alcohol use and evoke relevant change talk. This discussion  
15 222 culminates in the couple identifying what they would like alcohol use to look like in the  
16 223 coming month and developing a shared plan to accomplish that goal. The session ends  
17 224 with the counselor inviting the couple to notice communication successes and challenges  
18 225 and to schedule a pleasant event together in the coming month (in addition to  
19 226 summarizing the couple's alcohol related goals and plans).  
20  
21  
22  
23  
24  
25  
26  
27  
28  
29

30 227  
31  
32 228 **Session 2.** The session begins with a check-in on recent communication and goals from  
33 229 the previous session. The couple then completes a values card-sort exercise highlighting  
34 230 shared values and joint goals. For *Masibambisane*, the standard values card sort deck  
35 231 (43) used in previous MI interventions with couples (36) was modified to increase cultural  
36 232 relevance and translated into *isiZulu*. Following the card-sort exercise, counselors refocus  
37 233 the conversation on alcohol use by completing another calendar activity. For participants  
38 234 randomized to couples MI, this procedure mirrors that used in Session 1. For couples  
39 235 randomized to MI-plus, the counselor presents the couple with breathalyzer data for the  
40 236 index partner from the prior month, presented in a calendar format. Data for the non-index  
41 237 partner (if also reporting heavy alcohol use at baseline) are added to this calendar. In  
42 238 addition to debriefing the calendar, couples in the MI-plus condition discuss their  
43 239 experiences using the breathalyzer and receiving the BAC readings of their partner. After  
44 240 the calendar is created and debriefed, the counselor further evokes change talk with a  
45 241 series of questions about potential consequences of drinking. Similar to session 1, the  
46 242 discussion culminates in the couple identifying what might be reasonable drinking limits  
47  
48  
49  
50  
51  
52  
53  
54  
55  
56  
57

1 243 for the coming month and developing a shared plan to accomplish that goal. The session  
2 244 ends with the counselor inviting the couple to notice communication successes and  
3 245 challenges and to schedule a pleasant event together in the coming month (in addition to  
4 246 summarizing the couple's alcohol related goals and plans).

5 247  
6 248 **Session 3.** The session begins with a check-in on recent communication and goals from  
7 249 the previous session. Similar to session 2, counselors then refocus the conversation on  
8 250 alcohol use by completing another calendar activity. As in session 2, participants  
9 251 randomized to MI-only complete the calendar following session 1 procedures. Those  
10 252 randomized to MI-plus are presented with a calendar containing prior month breathalyzer  
11 253 data. After the calendar is created and debriefed, the counselor further evokes change  
12 254 talk with a series of questions about potential consequences of drinking specifically for  
13 255 HIV-related health care outcomes and the couple's communication and sexual  
14 256 interactions. Similar to session 1, this discussion culminates in the couple identifying their  
15 257 drinking goals for the coming month and developing a shared plan to accomplish that  
16 258 goal. Finally, counselors engage in a termination discussion. This begins by inviting the  
17 259 couple to reflect on their experiences over the past two months while engaged in the  
18 260 intervention. The couple then looks ahead and considers long-term goals – including  
19 261 specific goals for limits on alcohol use – and constructs a shared plan to accomplish them.

20 262  
21 263 **Mobile breathalyzer and app**  
22 264 We will use BACtrack View®, which consists of a handheld commercial-grade  
23 265 breathalyzer and accompanying mobile app. Index patients will receive twice-daily SMS  
24 266 message requests to complete a breathalyzer reading at 11 am and again at 8 pm. Given  
25 267 the frequent power outages in South Africa, which often result in a loss of cellular service,  
26 268 participants will be allowed to complete missed tests as soon as the power returns. To  
27 269 avoid disruptions in cellular service by having to manually purchase data, we will  
28 270 automatically provide cellular data to perform the tests. We will also provide phones to  
29 271 participants who do not have compatible smartphones and power banks to keep phones  
30 272 and breathalyzers charged during power outages.

31 273  
32 274 To complete a breathalyzer test, the participant will log into the mobile phone app and  
33 275 follow a series of prompts to blow into the breathalyzer in front of the phone camera,

1 276 which displays the BAC value, and transmits the BAC value and photo of the participant  
2 277 taking the test to the BACtrack View® server for storage. After successfully completing  
3 278 the test, the partner will receive an SMS message informing them of the BAC value from  
4 279 the index patient. The study coordinator is notified of BAC results and/or missed tests and  
5 280 can log into the BACtrack View® app to view all tests results completed over a monthly  
6 281 period. A trained technology navigator will be assigned to each couple, who will reach out  
7 282 to couples who are missing tests and will be available for support as couples are getting  
8 283 started with the BAC tests. At the end of each 30-day period, BAC results are mapped  
9 284 onto monthly calendars and used in subsequent MI counseling sessions.  
10 285

11 286 **Control arm: Enhanced usual care (EUC)**  
12 287 Couples in the control arm will receive EUC, with usual care defined by the South African  
13 288 national 2019 ART Clinical Guidelines (44). As part of clinical care for HIV, the harms of  
14 289 alcohol use are briefly discussed during the morning health talks in the waiting rooms of  
15 290 HIV clinics. HIV clients are advised that alcohol intake should be fewer than 2 standard  
16 291 drinks/day for men and 1 for women, and drinking should not occur daily (at most 5 out  
17 292 of 7 days per week). After randomization, couples in the control arm will receive additional  
18 293 alcohol counseling modeled on WHO guidelines and Conroy et al.'s intervention in  
19 294 Malawi, which uses participants' baseline AUDIT scores for messaging around alcohol  
20 295 reduction and lasts 10-15 minutes (45). In selecting the control, we chose to balance our  
21 296 ethical obligation to provide basic health information on alcohol use (minimal in this  
22 297 setting), while maximizing the generalizability of our findings to inform a future RCT, which  
23 298 will employ a EUC control group. Clinical trial experts recommend the usual care condition  
24 299 over other designs such as a time-and-attention control (TAC) when the long-term goal  
25 300 is to inform implementation science and scale-up (46,47). Our long-term goal will be to  
26 301 test the effectiveness of a scalable alcohol intervention. Moreover, because TAC designs  
27 302 have an active but different intervention, there is the risk of positively-biased intervention  
28 303 results because the comparison arm can distract participants from making reductions in  
29 304 alcohol use they would have otherwise made (46,47).  
30 305

31 306 **Training of staff**  
32 307 Given the skills required to deliver MI, we will hire certified HIV testing counselors with 2+  
33 308 years of counselling and/or facilitation and community experience. Facilitators and the

309 HSRC research manager will attend a week-long didactic training workshop (in-person,  
310 at the HSRC) with Dr. Starks. Dr. Starks is a licensed clinical psychologist and an MI-  
311 trainer certified by the Motivational Interviewing Network of Trainers.

312  
313 The training workshop will begin with a 1-day introduction to individual MI skills (30). This  
314 workshop will focus on the spirit of MI, engaging skills (open questions, affirmations,  
315 reflections, and summary statements), and recognizing change talk (expressions of  
316 desire, ability, reasons, need, commitment, activation, and taking-steps to change). The  
317 first training day will end with a demonstration of couples MI delivered in *isiZulu* (through  
318 a translator) by Dr. Starks. Days 2 through 5 will focus on the spirit, processes, and skills  
319 of MI with couples. Activities will consist of brief didactic presentations of content  
320 interspersed with worksheets to reinforce knowledge acquisition and a wide variety of  
321 role-play activities permitting practice. Beginning in day 3, role play activities will be used  
322 to introduce counselors to key aspects of the intervention protocol and facilitate practice  
323 with immediate feedback from Dr. Starks.

324  
325 Following the training workshop, all interventionists will complete a series of training mock  
326 sessions to practice the intervention content. These will be completed in English,  
327 recorded, and reviewed by Dr. Starks. Counselors will receive written feedback and meet  
328 biweekly with Dr. Starks to discuss progress in the mock session process and review  
329 relevant skills. All interventionists will complete a minimum of 2 mock sessions for each  
330 intervention component before being cleared to deliver the intervention to participants.

331  
332 We will also train a pair of interviewers to recruit couples and conduct assessment visits,  
333 who will be gender-matched to partners. Drs. Conroy and Butterfield will lead additional  
334 training with staff, covering topics on couples counseling, the mobile breathalyzer  
335 technology, how to handle ethical issues with couples, health education around alcohol  
336 use and HIV, the intervention manuals and procedures, and professional conduct.

337  
338 **Fidelity monitoring and supervision**  
339  
340 Once cleared, interventionists will meet monthly (via Zoom) with Dr. Starks for group  
341 supervision while sessions are ongoing during the trial. These meetings will provide an

342 opportunity to present and discuss cases, review relevant skills, and discuss ongoing  
343 challenges to protocol delivery.

344 Given the large number of sessions conducted, we will select a sample of sessions  
345 (around 15%) to perform additional fidelity checks giving equal attention to all counselors  
346 and all sessions. For these sessions, a peer facilitator (i.e., another counselor) or the  
347 research manager will complete a checklist using either transcripts or audio-recordings  
348 to ensure each activity in the manual was covered. Intervention sessions will be audio-  
349 recorded. Self-assessment forms will contain rating for key MI components (e.g.,  
350 collaboration, respect, etc.). A separate space on the checklist and self-assessment forms  
351 will be provided for written comments. After each session, counselors will complete the  
352 self-assessment form. Completed forms will be discussed in regular Zoom calls with the  
353 team to discuss areas where further guidance is needed and to help problem-solve  
354 challenges. Finally, Dr. Starks will listen and provide feedback on any sessions conducted  
355 with English-speaking couples as an additional check on fidelity to the intervention  
356 protocol.

357

## 358 **Recruitment**

359 Community-based recruitment will be used to identify index patients at community-based  
360 organizations or locations in the community where people who drink alcohol can be found.  
361 Recruiters will use procedures established at HSRC to identify and recruit participants  
362 using a community mobilization approach. A team of recruiters will target individuals and  
363 couples in public areas in the community, including alcohol venues (e.g., shebeens, bottle  
364 shops), markets, sports grounds, taxi ranks, HIV clinics, and community events. Though  
365 couples will be targeted together if possible, couples may not be together in public (48)  
366 and this could hinder successful recruitment of couples into research studies in the area.

367

368 Passive recruitment will also be utilized. This includes distributing community flyers  
369 describing the study and encouraging interested individuals to contact the project staff by  
370 calling or sending a free "please call me" SMS text message to the listed cellular phone  
371 number. Recruiters will respond to these messages as soon as possible, typically no later  
372 than the next working day. Passive recruitment will further be employed through flyers  
373 placed at the clinics. Clinic-based outreach teams and care providers will assist in

1 374 identifying HIV patients who use alcohol use and have been on ART for at least six  
2 375 months, referring them to HSRC recruiters. In all recruitment approaches, recruiters will  
3 376 ask potential participants if they would like to hear about the study and explain the nature  
4 377 of the study using standard recruitment scripts.  
5  
6 378

7

### 9 379 **Screening for participation**

11 380 Screening will be a two-step process. The initial screener will be delivered either in-person  
12 381 or over the phone. If recruited in person, the screener will take place in a private location  
13 382 identified by the recruiter. Partners in a couple will be screened separately to ensure  
14 383 confidentiality. If the participant cannot complete the initial screener in the field, the  
15 384 recruiter will record their contact information for a later phone screening. Once deemed  
16 385 eligible to continue, the recruiter will inform the index participant that their partner must  
17 386 also be screened. Contact information for the recruited partner will be collected and  
18 387 permission to call them will be obtained. Alternatively, the partner can initiate contact via  
19 388 a "please call me" SMS text message. The index participant will be provided with study  
20 389 information to share with the partner.  
21  
22  
23  
24  
25  
26  
27

28 390

30 391 Couples meeting initial eligibility criteria will be given a secondary screener in person that  
31 392 asks a variety of questions not limited to IPV. The members of the couple will be screened  
32 393 simultaneously but separately by gender-matched interviewers. The goal is to screen out  
33 394 illegitimate couples or those who experienced severe IPV in the past three months or  
34 395 have safety concerns. In case a couple is deemed ineligible due to IPV, they will not be  
35 396 informed of the reason for ineligibility to minimize any unintended harms. As part of the  
36 397 second screener, questions about how the couple met will be asked (with the answer not  
37 398 recorded). After completing the second screener, the two recruiters will compare their  
38 399 notes and determine if the couple is legitimate. If not, the recruiters will inform the couple  
39 400 of their ineligibility without providing a specific reason.  
40  
41  
42  
43  
44  
45  
46

47 401

49 402 During this screening interview, staff will use a rapid HIV test to confirm HIV status for all  
50 403 participants who reported living with HIV. If the index patient tests negative for HIV on the  
51 404 point-of-care (POC) HIV test, they will be considered ineligible. Both partners must be  
52 405 eligible for the couple to be considered eligible for the study.  
53  
54  
55  
56

57 406

1 407 If both members of the couple report heavy alcohol use during screening and are on ART,  
2 408 the male partner will be assigned to be the index patient given that drinking among men  
3 409 is generally more frequent than women in similar types of couples (18,49). For the MI-  
4 410 plus arm, only the index patient will receive the breathalyzer and mobile app as the tester;  
5 411 their partner will only receive SMS text notifications of their BAC levels.  
6  
7  
8  
9

412

### 413 **Randomization**

12 414 After informed consent and the baseline assessment, couples will be randomized to the  
13 415 control arm, the couple-based MI arm, or the couple-based MI with mobile breathalyzers  
14 416 arm (MI-plus). We will use randomly permuted block sizes (e.g., 3, 6, and 9) generated  
15 417 using a computerized and secure process. The UCSF project coordinator and the HSRC  
16 418 data manager will use the table that the study statistician created to print documents that  
17 419 assign participants to one of the three arms. These documents will be placed in sealed  
18 420 envelopes ordered sequentially in a box and maintained by the HSRC data manager in a  
19 421 locked cabinet. HSRC interviewers will take a small subset of envelopes into the field with  
20 422 them and will be trained to administer random assignments following the order of the  
21 423 envelopes. At the end of the baseline survey, the index patient will be given the envelope  
22 424 that contains the random assignment. Couples will receive an appointment card with a  
23 425 date for their next study visit following randomization.  
24  
25  
26  
27  
28  
29  
30  
31  
32  
33

426

### 427 **Blinding**

35 428 Counselors delivering the intervention cannot be blinded to the intervention condition.  
36 429 Assessment staff are different from the staff who delivered the intervention to a given  
37 430 couple. However, because the assessment staff work in close collaboration with the  
38 431 counselors in tracing couples and assisting with technology navigation for those in the  
39 432 MI-plus arm, we cannot fully guarantee that assessment staff will be blinded from the  
40 433 intervention condition as well. Participants will also not be blinded to the intervention  
41 434 condition and will be informed during randomization of their assigned group.  
42  
43  
44  
45  
46  
47  
48  
49

435

### 50 436 **Data collection**

51 437 Study assessments will occur at baseline, 2-months and 6-months post intervention  
52 438 initiation. The two-month visit will occur after completion of the MI sessions. All surveys  
53 439 will be delivered in-person using same-sex interviewers who are fluent in both English  
54  
55  
56  
57  
58  
59  
60

1 440 and isiZulu to be able to use the participants' preferred language. Study staff will enter  
2 441 data directly into REDCap using a mobile tablet. The REDCap mobile app is designed to  
3 442 be used without internet access, so it is suitable for areas with an internet connection.  
4 443

5 443

### 6 444 **Laboratory testing**

7 445 At the 2-month visit, dried blood spot (DBS) samples will be collected from all participants  
8 446 who reported heavy alcohol use at baseline to test for Phosphatidylethanol (PEth), an  
9 447 alcohol biomarker that is well correlated with total alcohol consumption in the prior 2-4  
10 448 weeks (50,51). Additionally, at the 2-month visit, DBS samples will be collected for all  
11 449 index patients living with HIV to test for viral load. We will prepare DBS by pipetting whole  
12 450 blood onto Whatman 903 cards. DBS cards for PEth will be stored at room temperature  
13 451 in locked cabinets and transported to a commercial laboratory in the United States for  
14 452 PEth quantification (16:0/18:1 analog), with lower limit of quantification of 8 ng/ml (52).  
15 453 PEth is well-correlated with breathalyzer-assessed number of days drinking over 21 days  
16 454 (53) and the volume of alcohol consumed in the past 21 days (51). DBS cards for viral  
17 455 load will be transported on a daily basis to an accredited laboratory in South Africa and  
18 456 processed using the Panther System with a lower limit of detection of 883 copies/ml.  
19 457

20 457

### 21 458 **Data management**

22 459 We will use built-in controls within REDCap to restrict out of range values and prompts  
23 460 will be given to alert the user to missing data or unusual entries. The mobile application  
24 461 displays questions on the screen and then gives interviewers the ability to enter  
25 462 responses directly into the mobile phone or tablet. Once complete, the research  
26 463 instrument (i.e., survey, baseline interview) is temporarily stored in a non-readable  
27 464 encrypted file on the device/tablet. When in an area with network coverage or back at the  
28 465 research office, completed forms are uploaded and removed from the tablets  
29 466 approximately every 60 seconds. If no network signal is present, the data is stored on the  
30 467 mobile device until such time that it detects a network signal. Checks will be placed to  
31 468 ensure correct information has been entered by the HSRC Research Manager.  
32 469 Information from the research instruments is then uploaded to a secured server. The data  
33 470 undergoes both internal and external quality checks, conducted by the UCSF Research  
34 471 Manager and the HSRC Data Science Unit. Additionally, incoming data will be monitored  
35 472 daily to identify any unusual or unexpected entries. In cases where such entries are  
36 473



1 473 detected, data queries will be generated, and the HSRC team will be contacted to address  
2 474 and resolve these queries.  
3

4 475

## 6 476 **Retention**

7 477 Upon enrollment, we will obtain contact information (e.g., two cell phone numbers,  
8 478 directions to households, and contact information for up to three other individuals) to  
9 479 facilitate tracking. Participants will be contacted regularly (e.g., twice a month) to update  
10 480 contact information and check on location. Prior to the assessment visits, reminder calls  
11 481 and SMS messages will be made to both partners one week before the appointment and  
12 482 again 1-2 days prior. For participants who miss appointments, we will limit the number of  
13 483 phone call attempts to 3-4 to respect privacy and the right to refuse. There may be special  
14 484 circumstances when outreach workers will be dispatched to participants' communities  
15 485 (with their prior consent) such as when calls do not go through.

16 486 We anticipate that we will lose a very small percentage of couples due to break-ups,  
17 487 deaths, and migration (<5%), which we have accounted for in recruitment and analysis  
18 488 plans. One assessment will be conducted with each partner separately following the  
19 489 break-up to understand when the couple broke up, whether study participation contributed  
20 490 to the break-up, and if not, other reasons for why the couple broke-up.

21 491 The breakup assessment will also allow us to identify any negative effects of participation  
22 492 on couples. If the study contributed to the break-up or the break-up was a negative  
23 493 experience, we will follow the adverse event logging process. We will continue to follow  
24 494 each partner individually and administer study assessments given that our study  
25 495 outcomes (e.g., alcohol use) are at the individual level. This will allow us to explore  
26 496 whether participation in the study, despite the break-up, had any effect on their alcohol  
27 497 use; however, couples who break-up before participation in the intervention will exit the  
28 498 study.

29 499

## 30 500 **Study outcomes**

### 31 501 ***Primary feasibility and acceptability outcomes***

32 502 The primary goal of this pilot trial is to assess feasibility and acceptability (F&A) of  
33 503 *Masibambisane*. The primary F&A outcomes and corresponding targets are: enrollment  
34

1 504 rate (proportion of eligible couples who enroll in the study; target: 80%) and retention rate  
2 505 (proportion of couples who complete the 6-month follow-up survey; target: 85%).  
3  
4

### 5 506 **Secondary feasibility and acceptability outcomes**

6 507 Secondary F&A outcomes are: satisfaction rate (proportion of couples who report being  
7 508 satisfied or very satisfied with *Masibambisane* at the two-month follow-up: target: 75%),  
8 509 mid-point survey completion rate (proportion of couples who complete the 2-month follow-  
9 510 up survey; target: 85%), session completion rates (proportion of couples who attend  
10 511 100% of sessions; target: 75%), and breathalyzer test completion rate (proportion of tests  
11 512 taken after prompted; target: 70%).  
12  
13  
14  
15  
16  
17

18 513 We will also assess fidelity to the intervention by having the manager or facilitators  
19 514 complete detailed checklists after each session to document activities conducted. As a  
20 515 second check, we will audio-record all sessions and have an independent research  
21 516 assistant listen to a subset of recordings and complete the same checklists. We set a  
22 517 target of 80% fidelity.  
23  
24  
25  
26  
27

28 518

### 29 519 **Secondary health outcomes**

30 520 Although we are not powered to examine treatment effects, we will explore the effect of  
31 521 *Masibambisane* on the alcohol use among the partner reporting hazardous alcohol use  
32 522 at baseline: number of drinking days in the past 30 days (assessed via the timeline follow-  
33 523 back, assessed at 2-months and 6-months), non-heavy alcohol use (i.e., a composite  
34 524 measure consisting of a negative AUDIT-C score (40) in the past three months and PEth  
35 525 value < 35 ng/ml, a recommended cutoff value (54), both assessed at 2-months), and raw  
36 526 AUDIT-C score (0-12); and among the partner with HIV: optimal ART adherence (95% or  
37 527 higher on the Visual Analog Scale/VAS (55)), and viral suppression (less than 1000  
38 528 copies/ml per HIV clinical guidelines) (44).  
39  
40  
41  
42  
43  
44  
45  
46

47 529 Additional exploratory outcomes include relationship dynamics such as constructive  
48 530 communication (communication patterns questionnaire (56);  $\alpha=0.69-0.72$ ); alcohol-  
49 531 specific partner social support (adapted based on the social provision scale (57);  
50 532  $\alpha=0.84$ ), trust (dyadic trust scale (58);  $\alpha=0.82$ ), intimacy (emotional intimacy subscale  
51 533 of Sternberg love scale(59);  $\alpha=0.90$ ), unity (inclusion of self-in-other measure (60)),  
52 534 relationship satisfaction (couple satisfaction index (61), single item), and sexual  
53  
54  
55  
56  
57  
58  
59  
60

1 535 satisfaction (couple sexual satisfaction scale (62);  $\alpha=0.89$ ). Because we expect that  
2 536 reductions in alcohol use and improvements in relationship dynamics may reduce IPV,  
3  
4 537 we will also explore effects on physical, sexual, and emotional violence as measured by  
5  
6 538 the WHO domestic violence module (63,64). All relationship dynamics and IPV types will  
7  
8 539 be modelled as continuous variables.

### 10 540 **Sample size**

11  
12 541 Formal tests of health outcomes or attempts to obtain valid estimates of effect sizes are  
13  
14 542 not statistically justified for the proposed study (65–69). Pilot studies, by design, cannot  
15  
16 543 definitively test hypotheses due to their smaller sample sizes and the frequent design  
17  
18 544 adjustments necessary to maximize recruitment, retention and quality assessment of  
19  
20 545 outcomes (65–69). Effect size estimates are not sufficiently reliable given the breadth of  
21  
22 546 the confidence intervals; however, to supply additional information, we conducted several  
23  
24 547 power analyses using NCSS PASS. In sum, our study is powered to detect small to  
25  
26 548 medium distances to confidence limits for descriptive statistics and medium to large  
27  
28 549 longitudinal analysis effects, though, as noted above, formal hypothesis testing will not  
29  
30 550 be the focus of this pilot study.

### 31 551 **Data analysis plan**

#### 32 552 ***Feasibility and acceptability data analysis***

33  
34 553 The primary analyses will include descriptive statistics of F&A indicators, comparing each  
35  
36 554 statistic (e.g., percent retained) to the threshold described above. Above-threshold  
37  
38 555 findings will suggest a reasonable level of F&A while below-threshold findings would  
39  
40 556 suggest that remedial modifications to study procedures and/or design would be required  
41  
42 557 prior to moving forward with a full-scale trial. We will stratify the statistics by gender to  
43  
44 558 consider sex as a biological variable.

#### 45 559 ***Exploratory hypotheses and analyses***

46  
47 560  
48 561 Although the primary objective is to assess F&A rather than to conduct formal hypothesis  
49  
50 562 tests, we will evaluate exploratory hypotheses as part of the assessment process. For  
51  
52 563 example, we expect that: 1) participants in the MI-only arm will report a greater reduction  
53  
54 564 in the number of drinking days and in lower odds of engaging in hazardous alcohol use  
55  
56 565 than participants in the EUC control arm; 2) participants in the MI-plus arm will report a  
57  
58  
59  
60

1 567 greater reduction in the number of drinking days and lower odds of engaging in hazardous  
2 568 alcohol use than participants in the MI-only arm. Secondly, we anticipate that  
3 569 intervention participants will report higher odds of adherence to ART and viral  
4 570 suppression than those in the EUC arm. We also anticipate the intervention participants  
5 571 in both arms will report higher (indicating more positive) scores on relationship dynamics  
6 572 and lower scores on IPV than those in the EUC arm.

7 573  
8 574 We will compute descriptive statistics to capture measures of central tendency for  
9 575 continuous variables and proportions for binary variables, by visit and by treatment arm.  
10 576 To explore the effect of *Masibambisane* on the secondary outcome of number of drinking  
11 577 days, we will use mixed-effects negative binomial regression models including all three  
12 578 timepoints. Negative binomial models are recommended for count-based outcomes like  
13 579 drinking days (70). For the AUDIT-C score, we will use linear mixed-effects models  
14 580 including all three timepoints. For optimal adherence to ART, we will use mixed-effects  
15 581 logistic regression models including all three timepoints. Models will include random  
16 582 effects for participants and couples, and fixed effects for timepoint and study arm,  
17 583 interaction of time and arm, and sex of the index patient. We will also explore the whether  
18 584 the effects are moderated by respondent type (i.e., index patient versus partner).

19 585 To explore effects on biomarker-based outcomes captured only at 2-months (e.g., heavy  
20 586 alcohol use, viral suppression) and only on index participants, we will use logistic  
21 587 regression models with treatment arm as the main predictor. For heavy alcohol use, which  
22 588 will be collected on both members of the couple, we will cluster based on couple ID to  
23 589 account for non-independent drinking levels within dual-drinking couples. All analyses will  
24 590 use an intent-to-treat approach to include every participant within the analysis based on  
25 591 their original randomization group. Statistical analyses will be conducted in Stata 18. If  
26 592 missing data exceeds 5%, we will use multiple imputation via chained equations following  
27 593 methods in our prior studies (71).

28 594

## 29 595 **Ethical considerations and dissemination**

### 30 596 ***Informed consent***

1 597 Participants will provide written informed consent for the following activities: 1) to  
2 598 participate in the second screening interview, which asks personal questions about IPV;  
3  
4 599 2) to participate in the RCT and all procedures, including providing blood samples for  
5  
6 600 PEth and viral load testing; and 3) to export alcohol biomarker DBS samples to the US  
7  
8 601 laboratory for testing. Partners will be consented individually in a private interview room  
9  
10 602 by a gender-matched interviewer in the isiZulu or English, depending on the participant's  
11  
12 603 preference. The consent process will cover topics on the purpose of the study, study  
13  
14 604 procedures, potential risks and benefits, how confidentiality will be ensured, voluntary  
15  
16 605 participation, the funding agency and study investigators, and contact information for the  
17  
18 606 study PIs. The interviewer will go over all aspects of consent verbally and address any  
19  
20 607 questions that the participant has about participation. We will capture signed consent  
21  
22 608 using the REDCap mobile app. Participants will be given a paper copy of the consent  
23  
24 609 forms. If participants are unable to read and write (as assessed by a brief reading  
25  
26 610 comprehension tool), the interviewer will have a witness monitor the informed consent  
27  
28 611 process and sign the consent form.  
29

612

### 613 ***Confidentiality and privacy***

30 614 Participants may face a loss of confidentiality, which could lead to social stigma,  
31  
32 615 discrimination, or physical and psychological harm due to their HIV status and alcohol  
33  
34 616 use. To protect confidentiality, various measures will be taken, including staff training,  
35  
36 617 using research identification numbers instead of names, and secure data storage. There  
37  
38 618 is also a risk of loss of privacy, especially when discussing sensitive topics like HIV and  
39  
40 619 alcohol use. Privacy will be maintained by using coded language and providing  
41  
42 620 participants with strategies to protect their privacy, such as using discreet covers for  
43  
44 621 breathalyzer devices and phones. Participants will be assured that their responses will  
45  
46 622 not be shared with their partners, and steps will be taken to address coercion or violence,  
47  
48 623 including referrals to appropriate services.

624

### 49 625 ***Data safety and monitoring***

50 626 This study protocol was approved by the HSRC Research Ethics Committee (REC:  
51  
52 627 Protocol Number 1/27/20/21), the UCSF Human Research Protection Program (HRPP;  
53  
54 628 Protocol Number 21-35034) and is registered with Clinicaltrials.gov (NCT#05756790). A  
55  
56 629 Data Safety and Monitoring Board (DSMB), composed of three independent experts in

1 630 the field of HIV and alcohol abuse, has been convened in accordance with NIH policy.  
2 631 They reviewed and approved the study procedures for trial monitoring on November 15,  
3 632 2022. The DSMB will convene every six months and also in response to the occurrence  
4 633 of any serious adverse events. Data on anticipated adverse events, including couple  
5 634 dissolution and IPV, will be gathered throughout the study and reported to the DSMB at  
6 635 biannual meetings. Unanticipated events and events reported spontaneously will also be  
7 636 summarized and reported at the meetings.

8 637

### 9 638 ***Trial modification and discontinuation***

10 639 Trial modifications will be allowed given that this is a pilot study designed to maximize  
11 640 feasibility and acceptability; however, major changes such as to eligibility criteria or key  
12 641 aspects of the trial design will require approval from the study sponsor and DSMB. In the  
13 642 case of major changes, amendments would be filed with the UCSF and HSRC institutional  
14 643 review boards and the clinicaltrials.gov record would be updated. Adverse events will be  
15 644 monitored by the DSMB, who could recommend pausing or halting of the study if needed.  
16 645 We have no plans to conduct any interim analyses for this small pilot study other than  
17 646 preliminary analyses of baseline data.

18 647

### 19 648 ***Ancillary and post-trial care***

20 649 Participants will be provided with a list of resources for community-based services for  
21 650 HIV, couples, and behavioral health at the start of the study. Participants who are flagged  
22 651 for suicidality, IPV, or serious mental health concerns will be referred by the research staff  
23 652 to *Lifeline* (i.e., a local organization that handles psychosocial or mental health issues and  
24 653 has expertise in couples counseling) or other mental health services. The research team  
25 654 will contact the service provider to set up an appointment and then inform the participant  
26 655 of their appointment schedule. The team will follow up with the participant later to ensure  
27 656 they were linked into services if they expressed an interest in obtaining help.

28 657

### 29 658 ***Dissemination***

30 659 Sharing of data and results generated by this project will be carried out in several ways.  
31 660 The study findings will be made available on clinicaltrials.gov. We will also deposit de-  
32 661 identified data in the US National Institute of Mental Health (NIMH) data archive (NDA)  
33 662 as required by the terms of the award. In collaboration with the HSRC community

1 663 outreach team, results will be presented at local community meetings attended by  
2 664 participants and key stakeholders such as alcohol vendors. Results will also be presented  
3 665 at community-level meetings held by district and local health officials in collaboration with  
4 666 local HIV care clinics to ensure findings are disseminated to HIV policy makers. Finally,  
5 667 results will be presented at HIV and alcohol use conferences and published in peer-review  
6 668 journals with authorship based upon intellectual contribution and guided by American  
7 669 Psychological Association guidelines.  
8  
9  
10  
11  
12  
13  
14  
15  
16  
17  
18  
19  
20  
21  
22  
23  
24  
25  
26  
27  
28  
29  
30  
31  
32  
33  
34  
35  
36  
37  
38  
39  
40  
41  
42  
43  
44  
45  
46  
47  
48  
49  
50  
51  
52  
53  
54  
55  
56  
57  
58  
59  
60

For peer review only

## 670 **Abbreviations**

671 SSA - Sub-Saharan Africa; PLWH - People Living with HIV; MI - Motivational Interviewing;  
672 BAC - Blood Alcohol Concentration; ART - Antiretroviral Therapy; HIV - Human  
673 Immunodeficiency Virus; F& A -Feasibility & Acceptability; IPV - Intimate Partner  
674 Violence; POC - Point-of-Care. EUC – Enhanced Usual Care; NIMH-National Institute of  
675 Mental Health. DSMB - Data Safety and Monitoring Board; HSRC- Human Sciences  
676 Research Council; USCF- University of California San Francisco; KZN - KwaZulu-Natal;  
677 TAC- Time-and-Attention Control; FGD – Focus Group Discussion; UNAIDS- The Joint  
678 United Nations Programmes on HIV/AIDS.

679

## 680 **Acknowledgements**

681 The authors would like to thank all the study participants for participating in this project,  
682 and the study staff at the Human Sciences Research Council.

683

## 684 **Authors' contributions**

685 AC serves as the principal investigator for the Masibambisane study and oversaw the  
686 completion of this manuscript. RB, LM, BC, and HH were contributing authors and served  
687 as project managers overseeing the implementation of the study protocol. TS, AvH, JH,  
688 and TN are study co-investigators. All authors have read and approved the final  
689 manuscript.

690

## 691 **Funding**

692 The Masibambisane RCT is funded by the US National Institute on Alcohol Abuse and  
693 Alcoholism (R34AA029649; PI Conroy) with additional support from grant  
694 K24AA022586 (PI Hahn). The funder had no role in study design and will not have any  
695 role during its execution, data analysis and interpretation, or dissemination of results.

## 696 **Availability of data and materials**

697 Please contact corresponding author for details. The data will be deposited in the National  
698 Institute of Mental Health (NIMH) Data Archive repository at regular intervals throughout  
699 the study.

700

701



1 702

2 703 **Declarations**

3 704

4 705 **Ethics approval and consent to participate**

5 706 All procedures were reviewed by the University of California San Francisco (UCSF)  
6 707 Human Research Protections Program and the Human Sciences Research Council  
7 708 (HSRC) Research Ethics Program.

8 709

9 710 **Consent for publication**

10 711 Not applicable.

11 712

12 713 **Competing interests**

13 714 The authors have no competing interests to disclose.

14 715

15 716 **Author details**16 717 Lindani Msimango (MSoc. Sc.): [LIMsimango@hsrc.ac.za](mailto:LIMsimango@hsrc.ac.za)17 718 Rita Butterfield (PhD): [Rita.Butterfield@ucsf.edu](mailto:Rita.Butterfield@ucsf.edu)18 719 Alastair van Heerden (PhD): [avanheerden@hsrc.ac.za](mailto:avanheerden@hsrc.ac.za)19 720 Tyrel J. Starks (PhD): [tstarks@hunter.cuny.edu](mailto:tstarks@hunter.cuny.edu)20 721 Torsten B. Neiland (PhD): [torsten.neilands@ucsf.edu](mailto:torsten.neilands@ucsf.edu)21 722 Judith A. Hahn (PhD): [judy.hahn@ucsf.edu](mailto:judy.hahn@ucsf.edu)22 723 Buyisile Chibi (PhD): [BChibi@hsrc.ac.za](mailto:BChibi@hsrc.ac.za)23 724 Hilton Humphries (PhD): [HHumphries@hsrc.ac.za](mailto:HHumphries@hsrc.ac.za)24 725 Amy A. Conroy (PhD): [Amy.Conroy@ucsf.edu](mailto:Amy.Conroy@ucsf.edu)

1 726  
2  
3 727  
4 728  
5  
6 729  
7  
8 730  
9  
10 731  
11 732  
12  
13 733  
14 734  
15  
16 735  
17  
18 736  
19  
20 737  
21 738  
22  
23 739  
24  
25 740  
26  
27 741  
28 742  
29  
30 743  
31  
32 744  
33 745  
34  
35 746  
36  
37 747  
38  
39 748  
40 749  
41  
42 750  
43  
44 751  
45  
46 752  
47 753  
48  
49 754  
50  
51 755  
52 756  
53  
54 757  
55  
56 758  
57  
58  
59  
60

## References

1. Hahn JA, Woolf-King SE, Muyindike W. Adding fuel to the fire: Alcohol's effect on the HIV epidemic in sub-saharan africa. *Curr HIV/AIDS Rep.* 2011;8(3).
2. Hendershot CS, Stoner SA, Pantalone DW, Simoni JM. Alcohol use and antiretroviral adherence: Review and meta-analysis. Vol. 52, *Journal of Acquired Immune Deficiency Syndromes.* 2009.
3. Wu ES, Metzger DS, Lynch KG, Douglas SD. Association between alcohol use and HIV viral load. Vol. 56, *Journal of Acquired Immune Deficiency Syndromes.* 2011.
4. Shuper PA, Neuman M, Kanteres F, Baliunas D, Joharchi N, Rehm J. Causal considerations on alcohol and HIV/AIDS - A systematic review. Vol. 45, *Alcohol and Alcoholism.* 2010.
5. Baliunas D, Rehm J, Irving H, Shuper P. Alcohol consumption and risk of incident human immunodeficiency virus infection: A meta-analysis. In: *International Journal of Public Health.* 2010.
6. Human Sciences Research Council (HSRC), HSRC. The Fifth South African National HIV Prevalence, Incidence, Behaviour and Communication Survey, 2017: HIV Impact Assessment Summary Report. Cape Town, HSRC Press. 2018;2017(July).
7. World Health Organization. WHO Regions Country Profiles. In: *WHO Regions Country Profiles.* 2014.
8. Kekwaletswe CT, Morojele NK. Alcohol use, antiretroviral therapy adherence, and preferences regarding an alcohol-focused adherence intervention in patients with human immunodeficiency virus. *Patient Prefer Adherence.* 2014;8.
9. Kader R, Seedat S, Govender R, Koch JR, Parry CD. Hazardous and harmful use of alcohol and/or other drugs and health status among South African patients attending HIV clinics. *AIDS Behav.* 2014;18(3).
10. Parry CD, Londani M, Shuper PA, Myers B, Kekwaletswe CT, Nkosi S, et al. Characteristics and drinking behaviour of patients on antiretroviral therapy who drink and attend HIV clinics in Tshwane, South Africa: Implications for

- 1 759 intervention. *S Afr Med J*. 2019;109(10).
- 2 760 11. Devries KM, Mak JYT, García-Moreno C, Petzold M, Child JC, Falder G, et al.
- 3 761 The global prevalence of intimate partner violence against women. Vol. 340,
- 4 762 Science. 2013.
- 5 763 12. García-Moreno C, Pallitto C, Devries K, Stöckl H, Watts C, Abrahams N. Global
- 6 764 and regional estimates of violence against women: prevalence and health effects
- 7 765 of intimate partner violence and non-partner sexual violence. 2013.
- 8 766 13. Gass JD, Stein DJ, Williams DR, Seedat S. Gender differences in risk for intimate
- 9 767 partner violence among south african adults. *J Interpers Violence*. 2011;26(14).
- 10 768 14. Kalichman SC, Simbayi LC, Kaufman M, Cain D, Jooste S. Alcohol use and
- 11 769 sexual risks for HIV/AIDS in sub-saharan Africa: Systematic review of empirical
- 12 770 findings. Vol. 8, *Prevention Science*. 2007.
- 13 771 15. Magidson JF, Saal W, Nel A, Remmert JE, Kagee A. Relationship between
- 14 772 depressive symptoms, alcohol use, and antiretroviral therapy adherence among
- 15 773 HIV-infected, clinic-attending patients in South Africa. *J Health Psychol*.
- 16 774 2017;22(11).
- 17 775 16. Kekwaletswe CT, Morojele NK. Patterns and predictors of antiretroviral therapy
- 18 776 use among alcohol drinkers at HIV clinics in Tshwane, South Africa. *AIDS Care -*
- 19 777 *Psychol Socio-Medical Asp AIDS/HIV*. 2014;26(SUPPL. 1).
- 20 778 17. Cichowitz C, Maraba N, Hamilton R, Charalambous S, Hoffmann CJ. Depression
- 21 779 and alcohol use disorder at antiretroviral therapy initiation led to disengagement
- 22 780 from care in South Africa. *PLoS One*. 2017;12(12).
- 23 781 18. Conroy AA, McKenna SA, Ruark A. Couple Interdependence Impacts Alcohol Use
- 24 782 and Adherence to Antiretroviral Therapy in Malawi. *AIDS Behav*. 2019;23(1).
- 25 783 19. Conroy AA, McKenna SA, Leddy A, Johnson MO, Ngubane T, Darbes LA, et al.
- 26 784 "If She is Drunk, I Don't Want Her to Take it": Partner Beliefs and Influence on
- 27 785 Use of Alcohol and Antiretroviral Therapy in South African Couples. *AIDS Behav*.
- 28 786 2017;21(7).
- 29 787 20. Conroy AA, Ruark A, McKenna SA, Tan JY, Darbes LA, Hahn JA, et al. The
- 30 788 Unaddressed Needs of Alcohol-Using Couples on Antiretroviral Therapy in
- 31 789 Malawi: Formative Research on Multilevel Interventions. *AIDS Behav*. 2020;24(6).
- 32 790 21. Starks TJ, Millar BM, Doyle KM, Bertone P, Ohadi J, Parsons JT. Motivational
- 33 791 interviewing with couples: A theoretical framework for clinical practice illustrated in

- 1 792 substance use and HIV prevention intervention with gay male couples. *Psychol*  
2 793 *Sex Orientat Gend Divers*. 2018;5(4).
- 3 794 22. Wandera B, Tumwesigye NM, Nankabirwa JI, Mafigiri DK, Parkes-Ratanshi RM,  
4 795 Kapiga S, et al. Efficacy of a Single, Brief Alcohol Reduction Intervention among  
5 796 Men and Women Living with HIV/AIDS and Using Alcohol in Kampala, Uganda: A  
6 797 Randomized Trial. *J Int Assoc Provid AIDS Care*. 2017;16(3).
- 7 798 23. Murphy DA, Chen X, Naar-King S, Parsons JT. Alcohol and marijuana use  
8 799 outcomes in the healthy choices motivational interviewing intervention for HIV-  
9 800 positive youth. *AIDS Patient Care STDS*. 2012;26(2).
- 10 801 24. Velasquez MM, von Sternberg K, Johnson DH, Green C, Carbonari JP, Parsons  
11 802 JT. Reducing Sexual Risk Behaviors and Alcohol Use Among HIV-Positive Men  
12 803 Who Have Sex With Men: A Randomized Clinical Trial. *J Consult Clin Psychol*.  
13 804 2009;77(4).
- 14 805 25. Naar-King S, Wright K, Parsons JT, Frey M, Templin T, Lam P, et al. Healthy  
15 806 choices: Motivational enhancement therapy for health risk behaviors in HIV-  
16 807 positive youth. *AIDS Educ Prev*. 2006;18(1).
- 17 808 26. Naar-King S, Lam P, Wang B, Wright K, Parsons JT, Frey MA. Brief report:  
18 809 Maintenance of effects of motivational enhancement therapy to improve risk  
19 810 behaviors and HIV-related health in a randomized controlled trial of youth living  
20 811 with HIV. *J Pediatr Psychol*. 2008;33(4).
- 21 812 27. Hasin DS, Aharonovich E, O'Leary A, Greenstein E, Pavlicova M, Arunajadai S, et  
22 813 al. Reducing heavy drinking in HIV primary care: A randomized trial of brief  
23 814 intervention, with and without technological enhancement. *Addiction*. 2013;108(7).
- 24 815 28. Hasin DS, Aharonovich E, Greenstein E. HealthCall for the smartphone:  
25 816 Technology enhancement of brief intervention in HIV alcohol dependent patients.  
26 817 *Addict Sci Clin Pract*. 2014;9(1).
- 27 818 29. Kahler CW, Pantalone DW, Mastroleo NR, Liu T, Bove G, Ramratnam B, et al.  
28 819 Motivational interviewing with personalized feedback to reduce alcohol use in  
29 820 HIV-infected men who have sex with men: A randomized controlled trial. *J*  
30 821 *Consult Clin Psychol*. 2018;86(8).
- 31 822 30. Miller, William R, Steven R. *Motivational interviewing: Helping people change &*  
32 823 *grow*. 4th ed. Guilford Press; 2023.
- 33 824 31. Robles G, Bosco SC, Dellucci T V., Starks TJ. *Integrating Intra-Individual and*

- 1 825 Dyadic Factors in Examining Health Among Gay and Bisexual Men: A Narrative  
2 826 Review of Recent Literature. Vol. 16, Journal of GLBT Family Studies. 2020.  
3  
4 827 32. Starks TJ, Dellucci T V., Gupta S, Robles G, Stephenson R, S. Sullivan P, et al. A  
5  
6 828 Pilot Randomized Trial of Intervention Components Addressing Drug Use in  
7  
8 829 Couples HIV Testing and Counseling (CHTC) with Male Couples. AIDS Behav.  
9  
10 830 2019;23(9).  
11 831 33. Starks TJ, Robles G, Doyle KM, Pawson M, Bertone P, Millar BM, et al.  
12  
13 832 Motivational interviewing with male couples to reduce substance use and hiv risk:  
14  
15 833 Manifestations of partner discord and strategies for facilitating dyadic functioning.  
16  
17 834 Psychotherapy. 2020;57(1).  
18 835 34. Starks TJ. Motivational interviewing with couples: A framework for behavior  
19  
20 836 change developed with sexual minority men. . Oxford University Press; 2022.  
21  
22 837 35. Starks TJ, Cruse C, Bosco S., Ingersoll K. Client perceptions of couples  
23  
24 838 motivational interviewing: A qualitative examination of male couples' statements  
25  
26 839 to counselor in session. Couns Psychother Res . 2023;  
27  
28 840 36. Starks TJ, Adebayo T, Kyre KD, Millar BM, Stratton MJ, Gandhi M, et al. Pilot  
29  
30 841 Randomized Controlled Trial of Motivational Interviewing with Sexual Minority  
31  
32 842 Male Couples to Reduce Drug Use and Sexual Risk: The Couples Health Project.  
33  
34 843 AIDS Behav. 2022;26(2).  
35  
36 844 37. Wang Y. Real-time assessment of alcohol use: The potential of wrist-worn alcohol  
37  
38 845 biosensor. In: Oral presentation given at the NIAAA ART/PrEP Meeting.  
39  
40 846 Bethesda, MA; 2019.  
41  
42 847 38. Lauckner C. Harnessing mHealth Technologies to Deliver a Behavioral Alcohol  
43  
44 848 Reduction Intervention: The TRAC Study. In: Oral presentation given at the  
45  
46 849 NIAAA ART/PrEP Meeting. Bethesda, MA;  
47  
48 850 39. Fairbairn CE, Kang D. Temporal Dynamics of Transdermal Alcohol Concentration  
49  
50 851 Measured via New-Generation Wrist-Worn Biosensor. Alcohol Clin Exp Res  
51  
52 852 [Internet]. 2019 Oct 30;43(10):2060–9. Available from:  
53  
54 853 <https://onlinelibrary.wiley.com/doi/10.1111/acer.14172>  
55  
56 854 40. Bush K, Kivlahan DR, McDonell MB, Fihn SD, Bradley KA. The AUDIT alcohol  
57  
58 855 consumption questions (AUDIT-C): An effective brief screening test for problem  
59  
60 856 drinking. Arch Intern Med. 1998;158(16).  
61  
62 857 41. Ellsberg M, Heise L, Peña R, Agurto S, Winkvist A. Researching domestic

- 1 858 violence against women: Methodological and ethical considerations. *Stud Fam*  
2 859 *Plann.* 2001;32(1).
- 3 860 42. Wingood GM, Diclemente RJ. The ADAPT-ITT model: A novel method of  
4 861 adapting evidence-based HIV interventions. *J Acquir Immune Defic Syndr.*  
5 862 2008;47(SUPPL. 1):40–6.
- 6 863 43. Miller WR, C'de Baca J, Matthews DB, Wilbourne PL. Personal Values Card Sort.  
7 864 *Univ New Mex.* 2001;
- 8 865 44. Republic of South Africa National Department of Health. 2019 ART Clinical  
9 866 Guidelines for the Management of HIV in Adults, Pregnancy, Adolescents,  
10 867 Children, Infants and Neonates. 2019.
- 11 868 45. Conroy AA, Tebbetts S, Darbes LA, Hahn JA, Neilands TB, McKenna SA, et al.  
12 869 Development of an Economic and Relationship-Strengthening Intervention for  
13 870 Alcohol Drinkers Living with HIV in Malawi. *AIDS Behav.* 2023;27(7).
- 14 871 46. Silverman HJ, Miller FG. Control group selection in critical care randomized  
15 872 controlled trials evaluating interventional strategies: An ethical assessment. Vol.  
16 873 32, *Critical Care Medicine.* 2004.
- 17 874 47. Vickers AJ, De Craen AJM. Why use placebos in clinical trials? A narrative review  
18 875 of the methodological literature. *J Clin Epidemiol.* 2000;53(2).
- 19 876 48. McMahon JM, Tortu S, Torres L, Pouget ER, Hamid R. Recruitment of  
20 877 heterosexual couples in public health research: A study protocol. *BMC Med Res*  
21 878 *Methodol.* 2003;3.
- 22 879 49. Woolf-King SE, Conroy AA, Fritz K, Johnson MO, Hosegood V, van Rooyen H, et  
23 880 al. Alcohol use and relationship quality among South African couples. *Subst Use*  
24 881 *Misuse.* 2019;54(4).
- 25 882 50. Perilli M, Toselli F, Franceschetto L, Cinquetti A, Ceretta A, Cecchetto G, et al.  
26 883 Phosphatidylethanol (PEth) in Blood as a Marker of Unhealthy Alcohol Use: A  
27 884 Systematic Review with Novel Molecular Insights. Vol. 24, *International Journal of*  
28 885 *Molecular Sciences.* 2023.
- 29 886 51. Ulwelling W, Smith K. The PEth Blood Test in the Security Environment: What it  
30 887 is; Why it is Important; and Interpretative Guidelines. Vol. 63, *Journal of Forensic*  
31 888 *Sciences.* 2018.
- 32 889 52. Jones J, Jones M, Plate C, Lewis D. The detection of 1-palmitoyl-2-oleoyl-sn-  
33 890 glycerol-3-phosphoethanol in human dried blood spots. *Anal Methods.* 2011;3(5).

- 1 891 53. Hahn JA, Dobkin LM, Mayanja B, Emenyonu NI, Kigozi IM, Shiboski S, et al.  
2 892 Phosphatidylethanol (PEth) as a Biomarker of Alcohol Consumption in HIV-  
3 893 Positive Patients in Sub-Saharan Africa. *Alcohol Clin Exp Res.* 2012;36(5):854–  
4 894 62.
- 5 895 54. Helander A, Hansson T. [National harmonization of the alcohol biomarker PEth].  
6 896 *Lakartidningen.* 110(39–40):1747–8.
- 7 897 55. Conroy AA, McKenna S, Ruark A, Neilands TB, Spinelli M, Gandhi M.  
8 898 Relationship Dynamics are Associated with Self-Reported Adherence but not an  
9 899 Objective Adherence Measure in Malawi. *AIDS Behav.* 2022;26(11).
- 10 900 56. Christensen A, Shenk JL. Communication, Conflict, and Psychological Distance in  
11 901 Nondistressed, Clinic, and Divorcing Couples. *J Consult Clin Psychol.* 1991;59(3).
- 12 902 57. Carolyn E. Cutrona, Weiss R. THE PROVISIONS OF SOCIAL RELATIONSHIPS  
13 903 AND ADAPTATION TO STRESS. *Adv Pers relationships.* 1974;1(1).
- 14 904 58. Larzelere RE, Huston TL. The Dyadic Trust Scale: Toward Understanding  
15 905 Interpersonal Trust in Close Relationships. *J Marriage Fam.* 1980;42(3).
- 16 906 59. Sternberg RJ. Construct validation of a triangular love scale. *Eur J Soc Psychol.*  
17 907 1997;27(3).
- 18 908 60. Aron A, Aron EN, Tudor M, Nelson G. Close Relationships as Including Other in  
19 909 the Self. *J Pers Soc Psychol.* 1991;60(2).
- 20 910 61. Funk JL, Rogge RD. Testing the Ruler With Item Response Theory: Increasing  
21 911 Precision of Measurement for Relationship Satisfaction With the Couples  
22 912 Satisfaction Index. *J Fam Psychol.* 2007;21(4).
- 23 913 62. Conroy AA, Ruark A, Neilands TB, Darbes LA, Johnson MO, Tan JY, et al.  
24 914 Development and Validation of the Couple Sexual Satisfaction Scale for HIV and  
25 915 Sexual Health Research. *Arch Sex Behav.* 2021;50(7).
- 26 916 63. WHO. WHO Multi-country Study on Women's Health and Domestic Violence:  
27 917 Core Questionnaire and WHO Instrument. Geneva, Switzerland; 2005.
- 28 918 64. Jewkes R, Dunkle K, Nduna M, Levin J, Jama N, Khuzwayo N, et al. Factors  
29 919 associated with HIV sero-status in young rural South African women: Connections  
30 920 between intimate partner violence and HIV. *Int J Epidemiol.* 2006;35(6).
- 31 921 65. Kraemer HC, Mintz J, Noda A, Tinklenberg J, Yesavage JA. Caution regarding  
32 922 the use of pilot studies to guide power calculations for study proposals. Vol. 63,  
33 923 *Archives of General Psychiatry.* 2006.

- 1 924 66. NIH/NCCIH. [https://nccih.nih.gov/grants/whatsnccihfunds/pilot\\_studies](https://nccih.nih.gov/grants/whatsnccihfunds/pilot_studies). 2017. Pilot  
2 925 Studies: Common Uses and Misuses.  
3  
4 926 67. Leon AC, Davis LL, Kraemer HC. The role and interpretation of pilot studies in  
5 clinical research. *J Psychiatr Res*. 2011;45(5).  
6 927  
7 928 68. Moore CG, Carter RE, Nietert PJ, Stewart PW. Recommendations for planning  
8 pilot studies in clinical and translational research. Vol. 4, *Clinical and translational*  
9 *science*. 2011.  
10 930  
11 931 69. Thabane L, Ma J, Chu R, Cheng J, Ismaila A, Rios LP, et al. A tutorial on pilot  
12 studies: The what, why and how. Vol. 10, *BMC Medical Research Methodology*.  
13 932 2010.  
14 933  
15 934 70. Horton NJ, Kim E, Saitz R. A cautionary note regarding count models of alcohol  
16 consumption in randomized controlled trials. *BMC Med Res Methodol*. 2007;7.  
17 935  
18 936 71. Conroy AA. The influence of relationship power dynamics on HIV testing in rural  
19 Malawi. *J Sex Res*. 2015;52(3).  
20 937  
21 938  
22 939
