# Supplementary material for: Couples motivational interviewing with mobile breathalysers to reduce alcohol use in South Africa: a pilot randomised controlled trial of Masibambisane
Source: PubMed Central journal article supplement — BMJ Open. 2024 Jan 30;14(1):e083390. doi: 10.1136/bmjopen-2023-083390 (PMC10828841; doi:10.1136/bmjopen-2023-083390), 2024-01-30
Supplement: bmjopen-2023-083390.reviewer_comments.pdf [file bmjopen-2023-083390.reviewer_comments.pdf]

## PEER REVIEW HISTORY

BMJ Open publishes all reviews undertaken for accepted manuscripts. Reviewers are asked to complete a checklist review form (<http://bmjopen.bmj.com/site/about/resources/checklist.pdf>) and are provided with free text boxes to elaborate on their assessment. These free text comments are reproduced below.

## ARTICLE DETAILS

|                            |                                                                                                                                                          |
|----------------------------|----------------------------------------------------------------------------------------------------------------------------------------------------------|
| <b>TITLE (PROVISIONAL)</b> | Couples Motivational Interviewing with Mobile Breathalyzers to Reduce Alcohol Use in South Africa: A Pilot Randomized Controlled Trial of Masibambisane  |
| <b>AUTHORS</b>             | Msimango, Lindani; Butterfield, Rita; Starks, Tyrel; van Heerden, Alastair; Neilands, Torsten; Hahn, JA; Chibi, Buyisile; Humphries, Hilton; Conroy, Amy |

This article was not externally reviewed at BMJ Open. Protocols that have been independently assessed prior to submission to BMJ Open are usually fast-tracked to publication on the grounds that further substantial changes will not be possible. This independent assessment will usually be external, independent review for both a substantial grant award from a non-commercial or government funder and ethics approval.
